# Supplementary material for: Mechanistic insights into the photocatalytic reduction of nitric oxide to nitrogen on oxygen-deficient quasi-two-dimensional bismuth-based perovskites
Source: Royal Society of Chemistry journal article supplement (doi:10.1039/d1en01090e), 2022-01-01
Supplement: d1en01090e2.pdf [file d1en01090e2.pdf]

## SUPPORTING INFORMATION II

### **Mechanistic Insights into Photocatalytic Reduction of Nitric Oxide to Nitrogen on Oxygen-Deficient Quasi-Two-Dimensional Bismuth-Based Perovskite**

Reshalaiti Hailili,<sup>a,‡</sup> Zhi-Qiang Wang,<sup>b,‡</sup> Hongwei Ji,<sup>a</sup> Chuncheng Chen,<sup>a</sup> Xue-Qing Gong,<sup>b,\*</sup> Hua Sheng,<sup>a,\*</sup> and Jincai Zhao<sup>a</sup>

<sup>a</sup>*Key Laboratory of Photochemistry, Institute of Chemistry, Chinese Academy of Sciences, Beijing National Laboratory for Molecular Sciences, Beijing 100190, P. R. China.*

<sup>b</sup>*Key Laboratory for Advanced Materials and Joint International Research Laboratory for Precision Chemistry and Molecular Engineering, Feringa Nobel Prize Scientist Joint Research Center, Centre for Computational Chemistry and Research Institute of Industrial Catalysis, School of Chemistry and Molecular Engineering, East China University of Science and Technology, Shanghai 200237, P. R. China.*

<sup>‡</sup>*These authors contributed equally to this work.*

**SBNO**

AutoCreat By Script: O Sr Nb Bi

1.0000000000000000  
5.5687300000000004 0.0000000000000000 0.0000000000000000  
0.0000000000000000 5.5318199999999997 0.0000000000000000  
0.0000000000000000 0.0000000000000000 25.1014300000000006

O Sr Nb Bi  
36 4 8 8

Selective dynamics

Direct

0.4498278300649110 0.1775779564641316 0.0002089968180509  
0.9498538579175262 0.8199012197808110 0.0002178145416063  
0.7364944278053415 0.4513801232702778 0.0675940169389491  
0.2365658647560704 0.5460646961920690 0.0675705409442945  
0.1396120257704928 0.0825634462765632 0.0857435363945224  
0.6397062221800951 0.9149147335373704 0.0857292323135508  
0.4641187019181299 0.2905552781205522 0.1577591155204490  
0.9641217492057510 0.7065643645986890 0.1577591415723214  
0.7319522456207188 0.9232902366735224 0.2581818753394065  
0.2320067931844914 0.0737588974541624 0.2581548536165161  
0.7320448677629008 0.4233064187855637 0.2422087821117982  
0.2320349278456646 0.5737393420650667 0.2422278375260961  
0.9641703936940060 0.2065318125702244 0.3426436177211782  
0.4639836835973267 0.7904885439379572 0.3426430661303769  
0.6397387894876481 0.4149388595845689 0.4146812075639476  
0.1395977474836937 0.5824679294527109 0.4146844364258621  
0.2365465385508981 0.0460021905728121 0.4328307720815605  
0.7364696726642902 0.9514132535990019 0.4327989398384876  
0.9498591123301188 0.3198907712703233 0.5002288524887634  
0.4498175036786652 0.6775781696622771 0.5002049851690158  
0.2366175822568296 0.0460873034271280 0.5675603167387494  
0.7365327026772983 0.9513303641132996 0.5675734071793908  
0.6395967111605456 0.4148889239232990 0.5857276144624650  
0.1395503386758087 0.5826272943914598 0.5857418419784597  
0.9640491986784687 0.2064887526010370 0.6577259296463933  
0.4641273665423405 0.7906166511426442 0.6577480699482147  
0.7319059047580876 0.4232380114086728 0.7582020109644199  
0.2318903340796175 0.5740093267011472 0.7582168465165365  
0.2319859897910332 0.0739909456758728 0.7421947928248916  
0.7320474262122123 0.9232667758912452 0.7422047073222826  
0.4639469761050067 0.2905659605231066 0.8426654665702761  
0.9640688474073856 0.7064449551815044 0.8426884316598354  
0.6396472967758392 0.9149060422566795 0.9146834106441725

0.1395531596854214 0.0825202457030741 0.9146895071953955  
0.7365251376606794 0.4513690693797626 0.9328213832380138  
0.2366274042532335 0.5460298316116421 0.9328496934306399  
0.5254346417369148 0.7181877975166494 0.0002117345872017  
0.0253850598919973 0.2792783449811365 0.0002115392783080  
0.5254337014946393 0.2181761872900635 0.5002004874543519  
0.0253773326811268 0.7792771132118822 0.5001983962590112  
0.5061058543780945 0.2229171293956806 0.0840712942274599  
0.0061454032981080 0.7744457933815968 0.0840783425821305  
0.0061146626000104 0.2744224874438416 0.4163211320709040  
0.5060850435593824 0.7228858396457337 0.4163292523555919  
0.0061393983001835 0.2745068908796797 0.5840461330946797  
0.5060696989891519 0.7228551690590670 0.5840547338147256  
0.5060774466917645 0.2228480860422526 0.9163525723227282  
0.0061228261093954 0.7744863729758431 0.9163597290961084  
0.0439790620448220 0.2921068707794296 0.1960214683055143  
0.5439935886656343 0.7049762075541582 0.1960451956291633  
0.5439458405686466 0.2050129886861040 0.3043349541626327  
0.0440041972707044 0.7921163510064265 0.3043586047722772  
0.5441108392742303 0.2049155107812135 0.6960250181478167  
0.0441065294861940 0.7922946549419031 0.6960151559192764  
0.0440597124697017 0.2922631489442118 0.8043833172783126  
0.5440448282507345 0.7049503576829074 0.8043628872648452

## SBNO-UT

AutoCreatByScript: O Sr Nb Bi

1.0000000000000000

5.5687300000000004 0.0000000000000000 0.0000000000000000  
0.0000000000000000 5.5318199999999997 0.0000000000000000  
0.0000000000000000 0.0000000000000000 25.1014300000000006

O Sr Nb Bi

35 4 8 8

Selective dynamics

Direct

0.4521172036055887 0.1806728465707721 0.9964560853248869  
0.9478060265476529 0.8232457438139349 0.0002905434621070  
0.7341832665624679 0.4548190290172016 0.0648713158168732  
0.2368476830812227 0.5477314488222476 0.0653085023742932  
0.1407098026193623 0.0867172500466964 0.0838282371635231  
0.6362174372346558 0.9194422043528547 0.0837658986460141  
0.4692791246245562 0.2964690290605105 0.1561084331942055  
0.9608618770883055 0.7036576978319076 0.1552682283251130  
0.7237075847537042 0.9208083529149320 0.2588095330058522

0.2221777708587140 0.0835929886217670 0.2595893243113778  
0.7326972757206036 0.4251376480105549 0.2418252451346348  
0.2310386173820262 0.5803533012331030 0.2405710207761445  
0.9628666202226555 0.2010491486558479 0.3456067548132609  
0.4645963272785565 0.7948580942260648 0.3453296799121901  
0.6411035539765066 0.4156813368989205 0.4175306879880338  
0.1420224002883188 0.5778166641053062 0.4177226685348927  
0.2357625196891462 0.0420965442350365 0.4359101771078215  
0.7360471684293515 0.9508043748302271 0.4360926741053035  
0.9526774207243776 0.3163317409277226 0.5043268210777825  
0.4546645894519941 0.6764903847810473 0.5044804905480902  
0.2412586160636181 0.0429917929791443 0.5718322458897234  
0.7391618127531743 0.9493916550645096 0.5726660809989639  
0.6412695300220292 0.4084135264663118 0.5891779895211116  
0.1430976697132920 0.5794156213628341 0.5886120788894047  
0.9714028507659123 0.2228228683817051 0.6628055170641147  
0.4694760548677266 0.7756830898217686 0.6621659013805967  
0.6884051191768634 0.4758918163531121 0.7477469342328646  
0.2662901760349783 0.0347049635339971 0.7490965877194711  
0.7764426765855177 0.9659854497554790 0.7523013256934021  
0.4376391480984054 0.3055765187601480 0.8404788636997509  
0.9848094580847757 0.7029476292906551 0.8381628081655705  
0.6427190355454186 0.9238919128186751 0.9098488334054693  
0.1367979565583894 0.0794322381077990 0.9128058082350847  
0.7323095119895839 0.4618576747093428 0.9284391930844222  
0.2320299044128191 0.5485338318426471 0.9324835088578922  
0.5246115942499188 0.7247595629963612 0.9972986348201047  
0.0224136176795255 0.2804716082915562 0.9976274996948362  
0.5276755452554909 0.2154726465520653 0.5031898725976092  
0.0279708254328597 0.7772215860205449 0.5034250385966601  
0.5044040417381623 0.2273318419121395 0.0818488775015282  
0.0063528934415586 0.7782617144682931 0.0805939483236955  
0.0058554365355761 0.2707707149619196 0.4185865375615947  
0.5060098651237510 0.7234080667553684 0.4183350464735227  
0.0103183969401925 0.2718029666865220 0.5874138855533459  
0.5089100833423998 0.7179896572112341 0.5873463099928316  
0.5016009637910912 0.2295992456057476 0.9129741517301966  
0.0034341859597973 0.7709339752497044 0.9113553697476675  
0.0414928676373236 0.3007838229031421 0.1941545907030999  
0.5448846991356575 0.7044197312603870 0.1936706641046726  
0.5409544342383299 0.2049601188873069 0.3039567706083730  
0.0403693779305669 0.7945911482462265 0.3035121005764054  
0.5490662289890551 0.1938519149912494 0.6914749243600156  
0.0322022134050641 0.7407268859699059 0.7060080742233339

0.0274637994316436 0.2794434181311942 0.7978365883341354  
0.5072711389297666 0.7308709546943675 0.7997081160360935

**SBNO(001)**

AutoCreatByScript: O Sr Nb Bi

1.0000000000000000  
11.1374600000000008 0.0000000000000000 0.0000000000000000  
0.0000000000000000 11.063639999999995 0.0000000000000000  
0.0000000000000000 0.0000000000000000 39.032229999999984

O Sr Nb Bi  
144 16 32 32

Selective dynamics

Direct

0.1108609999999999 0.0703140000000033 0.0000100000000032  
0.6108609999999999 0.0703140000000033 0.0000100000000032  
0.3611289999999983 0.2480490000000017 0.0000000000000000  
0.8611289999999983 0.2480490000000017 0.0000000000000000  
0.1108609999999999 0.5703140000000033 0.0000100000000032  
0.6108609999999999 0.5703140000000033 0.0000100000000032  
0.3611289999999983 0.7480490000000017 0.0000000000000000  
0.8611289999999983 0.7480490000000017 0.0000000000000000  
0.7207569999999990 0.3900569999999988 0.0449660000000023  
0.2207569999999990 0.3900569999999988 0.0449660000000023  
0.2207569999999990 0.8900569999999988 0.0449660000000023  
0.7207569999999990 0.8900569999999988 0.0449660000000023  
0.4706990000000033 0.4281849999999991 0.0450099999999978  
0.9706990000000033 0.4281849999999991 0.0450099999999978  
0.4706990000000033 0.9281849999999991 0.0450099999999978  
0.9706990000000033 0.9281849999999991 0.0450099999999978  
0.2502339999999990 0.1460379999999972 0.0575049999999990  
0.7502339999999990 0.1460379999999972 0.0575049999999990  
0.0003069999999994 0.1722370000000026 0.0575270000000003  
0.5003069999999994 0.1722370000000026 0.0575270000000003  
0.2502339999999990 0.6460379999999972 0.0575049999999990  
0.7502339999999990 0.6460379999999972 0.0575049999999990  
0.0003069999999994 0.6722370000000026 0.0575270000000003  
0.5003069999999994 0.6722370000000026 0.0575270000000003  
0.1105939999999990 0.0078310000000030 0.1009559999999965  
0.6105939999999990 0.0078310000000030 0.1009559999999965  
0.3604309999999984 0.3104030000000009 0.1009609999999981  
0.8604309999999984 0.3104030000000009 0.1009609999999981  
0.1105939999999990 0.5078310000000030 0.1009559999999965  
0.6105939999999990 0.5078310000000030 0.1009559999999965

0.360430999999984 0.810403000000009 0.100960999999981  
0.860430999999984 0.810403000000009 0.100960999999981  
0.250273000000000 0.146098000000021 0.144362000000010  
0.750273000000000 0.146098000000021 0.144362000000010  
0.000264999999988 0.172234000000031 0.144362999999985  
0.500264999999988 0.172234000000031 0.144362999999985  
0.250273000000000 0.646098000000021 0.144362000000010  
0.750273000000000 0.646098000000021 0.144362000000010  
0.000264999999988 0.672234000000031 0.144362999999985  
0.500264999999988 0.672234000000031 0.144362999999985  
0.220776000000007 0.390121999999981 0.156955000000035  
0.720776000000007 0.390121999999981 0.156955000000035  
0.470613999999976 0.428181999999996 0.156947000000024  
0.970613999999976 0.428181999999996 0.156947000000024  
0.220776000000007 0.890121999999981 0.156955000000035  
0.720776000000007 0.890121999999981 0.156955000000035  
0.470613999999976 0.928181999999996 0.156947000000024  
0.970613999999976 0.928181999999996 0.156947000000024  
0.110970000000018 0.070314000000033 0.201887999999967  
0.610970000000018 0.070314000000033 0.201887999999967  
0.360989000000036 0.247931000000012 0.201898999999974  
0.860989000000036 0.247931000000012 0.201898999999974  
0.110970000000018 0.570314000000033 0.201887999999967  
0.610970000000018 0.570314000000033 0.201887999999967  
0.360989000000036 0.747931000000012 0.201898999999974  
0.860989000000036 0.747931000000012 0.201898999999974  
0.269008999999969 0.402751000000021 0.260770000000008  
0.769008999999969 0.402751000000021 0.260770000000008  
0.019038000000019 0.415444999999983 0.260770000000008  
0.519038000000019 0.415444999999983 0.260770000000008  
0.269008999999969 0.902751000000021 0.260770000000008  
0.769008999999969 0.902751000000021 0.260770000000008  
0.019038000000019 0.915444999999983 0.260770000000008  
0.519038000000019 0.915444999999983 0.260770000000008  
0.269004000000025 0.152816000000014 0.262706999999989  
0.769004000000025 0.152816000000014 0.262706999999989  
0.019126000000000 0.165419999999975 0.262704999999969  
0.519126000000000 0.165419999999975 0.262704999999969  
0.269004000000025 0.652816000000014 0.262706999999989  
0.769004000000025 0.652816000000014 0.262706999999989  
0.019126000000000 0.665419999999975 0.262704999999969  
0.519126000000000 0.665419999999975 0.262704999999969  
0.3642756271530601 0.0038192795981458 0.3248815789431903  
0.8642756271530528 0.0038192795981458 0.3248815789431903

0.1143658612758169 0.3143472728447407 0.3249140751149416  
0.6143658612758169 0.3143472728447407 0.3249140751149416  
0.3642756271530601 0.5038192795981454 0.3248815789431903  
0.8642756271530528 0.5038192795981454 0.3248815789431903  
0.1143658612758169 0.8143472728447406 0.3249140751149416  
0.6143658612758169 0.8143472728447406 0.3249140751149416  
0.2443717208493127 0.1581929200599695 0.3751006791158393  
0.7443717208493128 0.1581929200599695 0.3751006791158393  
0.4942174750730662 0.1597680540539713 0.3751550631816130  
0.9942174750730662 0.1597680540539713 0.3751550631816130  
0.2443717208493127 0.6581929200599695 0.3751006791158393  
0.7443717208493128 0.6581929200599695 0.3751006791158393  
0.4942174750730662 0.6597680540539712 0.3751550631816130  
0.9942174750730662 0.6597680540539712 0.3751550631816130  
0.9961734670835211 0.4109040391568525 0.3848583900051236  
0.4961734670835208 0.4109040391568525 0.3848583900051236  
0.9961734670835211 0.9109040391568527 0.3848583900051236  
0.4961734670835208 0.9109040391568527 0.3848583900051236  
0.2463075030833425 0.4069914681690195 0.3848101025804189  
0.7463075030833421 0.4069914681690195 0.3848101025804189  
0.2463075030833425 0.9069914681690194 0.3848101025804189  
0.7463075030833421 0.9069914681690194 0.3848101025804189  
0.3658928520706657 0.0607150192475031 0.4315937447415166  
0.8658928520706655 0.0607150192475031 0.4315937447415166  
0.1167632811887297 0.2569967220559343 0.4316108564606791  
0.6167632811887298 0.2569967220559343 0.4316108564606791  
0.3658928520706657 0.5607150192475033 0.4315937447415166  
0.8658928520706655 0.5607150192475033 0.4315937447415166  
0.6167632811887298 0.7569967220559345 0.4316108564606791  
0.1167632811887297 0.7569967220559345 0.4316108564606791  
0.2533045098494120 0.3987057047941792 0.4736887152270323  
0.7533045098494124 0.3987057047941792 0.4736887152270323  
0.0033581259790608 0.4190265409233215 0.4735623120355162  
0.5033581259790610 0.4190265409233215 0.4735623120355162  
0.2533045098494120 0.8987057047941792 0.4736887152270323  
0.7533045098494124 0.8987057047941792 0.4736887152270323  
0.0033581259790608 0.9190265409233214 0.4735623120355162  
0.5033581259790610 0.9190265409233214 0.4735623120355162  
0.4837942006097057 0.1700092320301582 0.4895711988450495  
0.9837942006097052 0.1700092320301582 0.4895711988450495  
0.4837942006097057 0.6700092320301578 0.4895711988450495  
0.9837942006097052 0.6700092320301578 0.4895711988450495  
0.2337036846527584 0.1474724245101432 0.4898382056410135  
0.7337036846527585 0.1474724245101432 0.4898382056410135

0.2337036846527584 0.6474724245101432 0.4898382056410135  
0.7337036846527585 0.6474724245101432 0.4898382056410135  
0.1112891834685772 0.3297852875536620 0.5322744248488356  
0.6112891834685775 0.3297852875536620 0.5322744248488356  
0.1112891834685772 0.8297852875536623 0.5322744248488356  
0.6112891834685775 0.8297852875536623 0.5322744248488356  
0.3618514316185860 0.4882320602835112 0.5323566684017659  
0.8618514316185856 0.4882320602835112 0.5323566684017659  
0.3618514316185860 0.9882320602835115 0.5323566684017659  
0.8618514316185856 0.9882320602835115 0.5323566684017659  
0.0253886675391717 0.1518458264660824 0.5882412409678588  
0.5253886675391721 0.1518458264660824 0.5882412409678588  
0.0253886675391717 0.6518458264660824 0.5882412409678588  
0.5253886675391721 0.6518458264660824 0.5882412409678588  
0.2743418182272165 0.1642994529399364 0.5876503118029488  
0.7743418182272167 0.1642994529399364 0.5876503118029488  
0.2743418182272165 0.6642994529399366 0.5876503118029488  
0.7743418182272167 0.6642994529399366 0.5876503118029488  
0.0053397492629585 0.3979451442800750 0.5938931331210404  
0.5053397492629585 0.3979451442800750 0.5938931331210404  
0.0053397492629585 0.8979451442800743 0.5938931331210404  
0.5053397492629585 0.8979451442800743 0.5938931331210404  
0.2550578061995563 0.4192712642314440 0.5936710428960996  
0.7550578061995560 0.4192712642314440 0.5936710428960996  
0.2550578061995563 0.9192712642314439 0.5936710428960996  
0.7550578061995560 0.9192712642314439 0.5936710428960996  
0.381456999999975 0.036017000000011 0.100949999999974  
0.881456999999975 0.036017000000011 0.100949999999974  
0.131453999999980 0.282167000000012 0.100940999999988  
0.631453999999980 0.282167000000012 0.100940999999988  
0.381456999999975 0.536017000000011 0.100949999999974  
0.881456999999975 0.536017000000011 0.100949999999974  
0.131453999999980 0.782167000000012 0.100940999999988  
0.631453999999980 0.782167000000012 0.100940999999988  
0.6243654891169259 0.0316887614397909 0.4265440616784916  
0.1243654891169259 0.0316887614397909 0.4265440616784916  
0.1243654891169259 0.5316887614397909 0.4265440616784916  
0.6243654891169259 0.5316887614397909 0.4265440616784916  
0.3742757482171704 0.2860741990032786 0.4265418609659391  
0.8742757482171700 0.2860741990032786 0.4265418609659391  
0.3742757482171704 0.7860741990032789 0.4265418609659391  
0.8742757482171700 0.7860741990032789 0.4265418609659391  
0.1265810000000016 0.033133999999969 0.046723000000001  
0.6265810000000016 0.033133999999969 0.046723000000001



0.3766129999999990 0.2849610000000027 0.0467140000000015  
0.8766129999999990 0.2849610000000027 0.0467140000000015  
0.1265810000000016 0.5331339999999969 0.0467230000000001  
0.6265810000000016 0.5331339999999969 0.0467230000000001  
0.3766129999999990 0.7849610000000027 0.0467140000000015  
0.8766129999999990 0.7849610000000027 0.0467140000000015  
0.6266579999999990 0.0332689999999971 0.1551869999999980  
0.1266579999999990 0.0332689999999971 0.1551869999999980  
0.3765950000000018 0.2850719999999995 0.1551660000000012  
0.8765950000000018 0.2850719999999995 0.1551660000000012  
0.1266579999999990 0.5332689999999971 0.1551869999999980  
0.6266579999999990 0.5332689999999971 0.1551869999999980  
0.3765950000000018 0.7850719999999995 0.1551660000000012  
0.8765950000000018 0.7850719999999995 0.1551660000000012  
0.3703740008330949 0.0324038970940166 0.3713726439520473  
0.8703740008330941 0.0324038970940166 0.3713726439520473  
0.1204152395006873 0.2854528622207323 0.3713853475515037  
0.6204152395006874 0.2854528622207323 0.3713853475515037  
0.3703740008330949 0.5324038970940166 0.3713726439520473  
0.8703740008330941 0.5324038970940166 0.3713726439520473  
0.1204152395006873 0.7854528622207323 0.3713853475515037  
0.6204152395006874 0.7854528622207323 0.3713853475515037  
0.3722932419028326 0.0344700223098592 0.4808350908872775  
0.8722932419028323 0.0344700223098592 0.4808350908872775  
0.1222643726786243 0.2831919613305948 0.4809138760883300  
0.6222643726786242 0.2831919613305948 0.4809138760883300  
0.3722932419028326 0.5344700223098592 0.4808350908872775  
0.8722932419028323 0.5344700223098592 0.4808350908872775  
0.1222643726786243 0.7831919613305951 0.4809138760883300  
0.6222643726786242 0.7831919613305951 0.4809138760883300  
0.1580489999999983 0.2694120000000026 0.2292950000000005  
0.6580489999999983 0.2694120000000026 0.2292950000000005  
0.1580489999999983 0.7694120000000026 0.2292950000000005  
0.6580489999999983 0.7694120000000026 0.2292950000000005  
0.4078700000000026 0.0492119999999971 0.2293179999999992  
0.9078700000000026 0.0492119999999971 0.2293179999999992  
0.4078700000000026 0.5492119999999971 0.2293179999999992  
0.9078700000000026 0.5492119999999971 0.2293179999999992  
0.6577989999999971 0.0193160000000034 0.2941629999999975  
0.1577989999999971 0.0193160000000034 0.2941629999999975  
0.4080250000000021 0.2991209999999995 0.2941769999999977  
0.9080250000000021 0.2991209999999995 0.2941769999999977  
0.1577989999999971 0.5193160000000034 0.2941629999999975  
0.6577989999999971 0.5193160000000034 0.2941629999999975

0.4080250000000021 0.7991209999999995 0.2941769999999977  
0.9080250000000021 0.7991209999999995 0.2941769999999977  
0.1724842836000239 0.0222687081068975 0.5498866556036800  
0.6724842836000239 0.0222687081068975 0.5498866556036800  
0.4224307444743602 0.2972382702166279 0.5500456944148474  
0.9224307444743604 0.2972382702166279 0.5500456944148474  
0.1724842836000239 0.5222687081068974 0.5498866556036800  
0.6724842836000239 0.5222687081068974 0.5498866556036800  
0.4224307444743602 0.7972382702166281 0.5500456944148474  
0.9224307444743604 0.7972382702166281 0.5500456944148474  
0.3943948805128984 0.0429145733399236 0.6168309464497663  
0.8943948805128982 0.0429145733399236 0.6168309464497663  
0.1452643786712050 0.2750998855564651 0.6168358006897430  
0.6452643786712045 0.2750998855564651 0.6168358006897430  
0.3943948805128984 0.5429145733399235 0.6168309464497663  
0.8943948805128982 0.5429145733399235 0.6168309464497663  
0.1452643786712050 0.7750998855564653 0.6168358006897430  
0.6452643786712045 0.7750998855564653 0.6168358006897430

## SBNO-UT-1

AutoCreatByScript: O Sr Nb Bi

1.0000000000000000

11.1374600000000008 0.0000000000000000 0.0000000000000000

0.0000000000000000 11.0636399999999995 0.0000000000000000

0.0000000000000000 0.0000000000000000 39.0322299999999984

O Sr Nb Bi

143 16 32 32

Selective dynamics

Direct

0.1108609999999999 0.0703140000000033 0.0000100000000032

0.6108609999999999 0.0703140000000033 0.0000100000000032

0.3611289999999983 0.2480490000000017 0.0000000000000000

0.8611289999999983 0.2480490000000017 0.0000000000000000

0.1108609999999999 0.5703140000000033 0.0000100000000032

0.6108609999999999 0.5703140000000033 0.0000100000000032

0.3611289999999983 0.7480490000000017 0.0000000000000000

0.8611289999999983 0.7480490000000017 0.0000000000000000

0.7207569999999990 0.3900569999999988 0.0449660000000023

0.2207569999999990 0.3900569999999988 0.0449660000000023

0.2207569999999990 0.8900569999999917 0.0449660000000023

0.7207569999999990 0.8900569999999917 0.0449660000000023

0.4706990000000033 0.4281849999999991 0.0450099999999978

0.9706990000000033 0.4281849999999991 0.0450099999999978

0.4706990000000033 0.9281849999999991 0.0450099999999978  
0.9706990000000033 0.9281849999999991 0.0450099999999978  
0.2502339999999990 0.1460379999999972 0.0575049999999990  
0.7502339999999990 0.1460379999999972 0.0575049999999990  
0.0003069999999994 0.1722370000000026 0.0575270000000003  
0.5003069999999994 0.1722370000000026 0.0575270000000003  
0.2502339999999990 0.6460379999999990 0.0575049999999990  
0.7502339999999990 0.6460379999999990 0.0575049999999990  
0.0003069999999994 0.6722370000000026 0.0575270000000003  
0.5003069999999994 0.6722370000000026 0.0575270000000003  
0.1105939999999990 0.0078310000000030 0.1009559999999965  
0.6105939999999990 0.0078310000000030 0.1009559999999965  
0.3604309999999984 0.3104030000000009 0.1009609999999981  
0.8604309999999984 0.3104030000000009 0.1009609999999981  
0.1105939999999990 0.5078310000000030 0.1009559999999965  
0.6105939999999990 0.5078310000000030 0.1009559999999965  
0.3604309999999984 0.8104030000000009 0.1009609999999981  
0.8604309999999984 0.8104030000000009 0.1009609999999981  
0.2502730000000000 0.1460980000000021 0.1443620000000010  
0.7502730000000000 0.1460980000000021 0.1443620000000010  
0.0002649999999988 0.1722340000000031 0.1443629999999985  
0.5002649999999988 0.1722340000000031 0.1443629999999985  
0.2502730000000000 0.6460980000000021 0.1443620000000010  
0.7502730000000000 0.6460980000000021 0.1443620000000010  
0.0002649999999988 0.6722340000000031 0.1443629999999985  
0.5002649999999988 0.6722340000000031 0.1443629999999985  
0.2207760000000007 0.3901219999999981 0.1569550000000035  
0.7207760000000007 0.3901219999999981 0.1569550000000035  
0.4706139999999976 0.4281819999999996 0.1569470000000024  
0.9706139999999976 0.4281819999999996 0.1569470000000024  
0.2207760000000007 0.8901219999999981 0.1569550000000035  
0.7207760000000007 0.8901219999999981 0.1569550000000035  
0.4706139999999976 0.9281819999999996 0.1569470000000024  
0.9706139999999976 0.9281819999999996 0.1569470000000024  
0.1109700000000018 0.0703140000000033 0.2018879999999967  
0.6109700000000018 0.0703140000000033 0.2018879999999967  
0.3609890000000036 0.2479310000000012 0.2018989999999974  
0.8609890000000036 0.2479310000000012 0.2018989999999974  
0.1109700000000018 0.5703140000000033 0.2018879999999967  
0.6109700000000018 0.5703140000000033 0.2018879999999967  
0.3609890000000036 0.7479310000000012 0.2018989999999974  
0.8609890000000036 0.7479310000000012 0.2018989999999974  
0.2690089999999969 0.4027510000000021 0.2607700000000008  
0.7690089999999969 0.4027510000000021 0.2607700000000008

0.0190380000000019 0.4154449999999983 0.2607700000000008  
0.5190380000000019 0.4154449999999983 0.2607700000000008  
0.2690089999999969 0.9027510000000021 0.2607700000000008  
0.7690089999999969 0.9027510000000021 0.2607700000000008  
0.0190380000000019 0.9154449999999983 0.2607700000000008  
0.5190380000000019 0.9154449999999983 0.2607700000000008  
0.2690040000000025 0.1528160000000014 0.2627069999999989  
0.7690040000000025 0.1528160000000014 0.2627069999999989  
0.0191260000000000 0.1654199999999975 0.2627049999999969  
0.5191260000000000 0.1654199999999975 0.2627049999999969  
0.2690040000000025 0.6528160000000014 0.2627069999999989  
0.7690040000000025 0.6528160000000014 0.2627069999999989  
0.0191260000000000 0.6654199999999975 0.2627049999999969  
0.5191260000000000 0.6654199999999975 0.2627049999999969  
0.3593198758797911 0.0000191368493766 0.3255749778228890  
0.8616071165352244 0.0010760016937640 0.3249992231915881  
0.1087866667650013 0.3163066167672416 0.3252368553977883  
0.6072681454579977 0.3167801618080917 0.3255190789333035  
0.3578409457018573 0.5004854486311990 0.3256972736420591  
0.8605208043293534 0.5022975909602679 0.3249982097266203  
0.1081906774628935 0.8167340488005204 0.3254161043491270  
0.6112308585499484 0.8164654457252748 0.3252313670538561  
0.2318446909369877 0.1525534473662543 0.3730132926069075  
0.7324738555366477 0.1518173269256766 0.3727398290338466  
0.4832796099071729 0.1638254008001238 0.3743116099154023  
0.9825325133922820 0.1640564578090847 0.3741511323940800  
0.2321195196472600 0.6529868066474729 0.3741894945434713  
0.7336889829492750 0.6534338980879045 0.3741230867085738  
0.4824546487358845 0.6646798763873780 0.3729777940931882  
0.9826043158386207 0.6646451197313087 0.3736526074397002  
0.9936188555227792 0.4146552353692165 0.3836983308673944  
0.4930645881733589 0.4146072391316435 0.3838940863950617  
0.9916042125252150 0.9145371840409473 0.3845462102855520  
0.4928779336726706 0.9132318278763357 0.3841125925749168  
0.2429534958844832 0.4019106493501219 0.3842955678908702  
0.7440900180878138 0.4028356772815668 0.3829452657387973  
0.2420122582731710 0.9023364370471507 0.3840128005785974  
0.7425511427844828 0.9037615981620490 0.3844383752291999  
0.3556542533857769 0.0579630116426829 0.4287061854853361  
0.8544614538256572 0.0645889270969801 0.4300627192699351  
0.1071195098272428 0.2617179521795348 0.4303481956811841  
0.6140518751002521 0.2645642416116358 0.4297515624756026  
0.3599637216490172 0.5557779762236309 0.4302445949339459  
0.8588158772896749 0.5510855117808978 0.4300684789999044

0.6058791783244057 0.7543936715323001 0.4293618208964032  
0.1059841498210821 0.7582666541944795 0.4299730259689686  
0.2503924232439715 0.3937732874943817 0.4744580924676342  
0.7498753833130135 0.3930922246937639 0.4755186172816604  
0.0011536641363477 0.4225657513052030 0.4752121096224074  
0.5001128153383627 0.4239695795508118 0.4743853844293578  
0.2464911913291975 0.8926827753334837 0.4729581714623901  
0.7484171799924819 0.8936908510337204 0.4694721135899222  
0.9967787769371638 0.9256375029097786 0.4713643730737959  
0.4960179564620472 0.9221422551464541 0.4702975736114902  
0.4677359677572785 0.1773802133485606 0.4836699074853136  
0.9647919130852711 0.1769615619350282 0.4858520479222901  
0.4654685744431957 0.6821133745526231 0.4867413149037750  
0.9617332680610406 0.6812220007591232 0.4840958033805999  
0.2159107653434758 0.1357178829459744 0.4838585568197547  
0.7127503356994371 0.1352457694613555 0.4877219627533226  
0.2158748871702708 0.6404441616658453 0.4851265601334118  
0.7147931312740284 0.6392607791456980 0.4857278915543795  
0.1139463226729310 0.2978176285005285 0.5315484884037701  
0.6079272963691287 0.3176499980774187 0.5321997259555266  
0.0889791586487254 0.8231046878137798 0.5293110908128315  
0.6124318290580782 0.8392890490453123 0.5272339546558397  
0.3605495141562677 0.5060642643919039 0.5312915499819884  
0.8630373901741857 0.5077064101997473 0.5315838006657317  
0.3580361306965140 0.9938082217703951 0.5286663505757564  
0.8498746376659688 0.9834477926738970 0.5293061383458501  
0.0129817306310095 0.1320700986461295 0.5855464876819523  
0.5178893640188617 0.1764503539490634 0.5974000965536117  
0.0214709941858360 0.6475378510168227 0.5899534542803220  
0.5410727237256659 0.6730821572963452 0.5767145866122001  
0.2854287784296149 0.1546710441171872 0.5826367667643515  
0.7696097301258942 0.1546821371047569 0.5901738015503695  
0.2625773289641841 0.6985304251918208 0.5801512685503664  
0.7690377451559089 0.6414904974632413 0.5970199125688036  
0.0221101456866216 0.3979261207541080 0.5930667092374111  
0.5495824386031882 0.4230298379911946 0.5986865375125831  
0.9968070498772035 0.8800995108433355 0.5953748648169948  
0.4882846494624727 0.9083871389879107 0.5923777557382804  
0.7839794419438684 0.3991258329621165 0.5944664177687694  
0.2294259548693230 0.9386605926049200 0.5988012050446607  
0.7556826789358412 0.9075887383101844 0.5908679601176193  
0.3814569999999975 0.0360170000000011 0.1009499999999974  
0.8814569999999975 0.0360170000000011 0.1009499999999974  
0.1314539999999980 0.2821670000000012 0.1009409999999988

0.631453999999980 0.282167000000012 0.100940999999988  
0.381456999999975 0.536017000000011 0.100949999999974  
0.881456999999975 0.536017000000011 0.100949999999974  
0.131453999999980 0.782167000000012 0.100940999999988  
0.631453999999980 0.782167000000012 0.100940999999988  
0.6207861557117142 0.0383782170875482 0.4266642460592730  
0.1242219318675376 0.0350624911942898 0.4266501719081090  
0.1240350733223700 0.5311046349660904 0.4278114900024851  
0.6247989453153825 0.5272891917927534 0.4278427714272174  
0.3766142768198575 0.2861164366425316 0.4278650900802791  
0.8720502528421887 0.2902020698513143 0.4277483631742070  
0.3714770830070247 0.7822565819713979 0.4271003183219912  
0.8734490479350490 0.7783467565801819 0.4262278643721444  
0.126581000000016 0.033133999999969 0.046723000000001  
0.626581000000016 0.033133999999969 0.046723000000001  
0.376612999999990 0.284961000000027 0.046714000000015  
0.876612999999990 0.284961000000027 0.046714000000015  
0.126581000000016 0.533133999999969 0.046723000000001  
0.626581000000016 0.533133999999969 0.046723000000001  
0.376612999999990 0.784961000000027 0.046714000000015  
0.876612999999990 0.784961000000027 0.046714000000015  
0.626657999999990 0.033268999999971 0.155186999999980  
0.126657999999990 0.033268999999971 0.155186999999980  
0.376595000000018 0.285071999999995 0.155166000000012  
0.876595000000018 0.285071999999995 0.155166000000012  
0.126657999999990 0.533268999999971 0.155186999999980  
0.626657999999990 0.533268999999971 0.155186999999980  
0.376595000000018 0.785071999999995 0.155166000000012  
0.876595000000018 0.785071999999995 0.155166000000012  
0.3665914408803309 0.0320509821352994 0.3723735815697095  
0.8661315271421247 0.0319601760314503 0.3714854480171480  
0.1166802168346256 0.2853033301057782 0.3718193016776233  
0.6170713686733497 0.2852041667655425 0.3722892677960751  
0.3667763091520136 0.5318489660091430 0.3723614901766751  
0.8670045778563352 0.5316528557587414 0.3717428658429848  
0.1162298765528026 0.7853516400460520 0.3719756871950490  
0.6163718200542966 0.7851141677153886 0.3718049816482721  
0.3726648229190167 0.0349323425092666 0.4811646140155865  
0.8715908801174767 0.0356910660728622 0.4794748812575551  
0.1243044300689847 0.2819106207158714 0.4821532955844378  
0.6212431126341281 0.2831956289159406 0.4849613385782173  
0.3729013039911079 0.5347103091507167 0.4835343979426100  
0.8732198103758367 0.5337909744953105 0.4832776574115757  
0.1206270311796362 0.7816876291883816 0.4811959661633928

0.6235841489929287 0.7828739661150139 0.4795247403344333  
0.1580489999999983 0.2694120000000026 0.2292950000000005  
0.6580489999999983 0.2694120000000026 0.2292950000000005  
0.1580489999999983 0.7694120000000026 0.2292950000000005  
0.6580489999999983 0.7694120000000026 0.2292950000000005  
0.4078700000000026 0.0492119999999971 0.2293179999999992  
0.9078700000000026 0.0492119999999971 0.2293179999999992  
0.4078700000000026 0.5492119999999971 0.2293179999999992  
0.9078700000000026 0.5492119999999971 0.2293179999999992  
0.6577989999999971 0.0193160000000034 0.2941629999999975  
0.1577989999999971 0.0193160000000034 0.2941629999999975  
0.4080250000000021 0.2991209999999995 0.2941769999999977  
0.9080250000000021 0.2991209999999995 0.2941769999999977  
0.1577989999999971 0.5193160000000034 0.2941629999999975  
0.6577989999999971 0.5193160000000034 0.2941629999999975  
0.4080250000000021 0.7991209999999995 0.2941769999999977  
0.9080250000000021 0.7991209999999995 0.2941769999999977  
0.1628701340591670 0.0406346014279540 0.5533581295058719  
0.6672886656428952 0.0197849931221309 0.5506849049834516  
0.4060995976052557 0.3119290729708010 0.5661778583456335  
0.9292308854131724 0.2861108335847206 0.5565773902789628  
0.1721107737469344 0.5260485446213530 0.5621039429076943  
0.6708028950844656 0.5190576248025554 0.5572041454798885  
0.4156416953082904 0.7908681144116029 0.5486395563725285  
0.9093024815102101 0.7898256406657530 0.5522097896921755  
0.3820526727821036 0.0459711706153602 0.6185553606261328  
0.8918771144989542 0.0297926974048292 0.6165660637020364  
0.2529485632708813 0.4131860023479828 0.6307764653883238  
0.6592666964238089 0.2775414916793120 0.6229701433310085  
0.4947761187684399 0.5134758628492647 0.6493134849525078  
0.9104301547228717 0.5239859205173156 0.6205245534095669  
0.1491191395334816 0.7721524364636387 0.6176189956097472  
0.6231264559385786 0.7629642447138152 0.6180101798449918

**SBNO-UT-2**

AutoCreatByScript: O Sr Nb Bi

1.0000000000000000  
11.1374600000000008 0.0000000000000000 0.0000000000000000  
0.0000000000000000 11.0636399999999995 0.0000000000000000  
0.0000000000000000 0.0000000000000000 39.0322299999999984

O Sr Nb Bi  
143 16 32 32

Selective dynamics

Direct

|                    |                    |                    |
|--------------------|--------------------|--------------------|
| 0.1108609999999999 | 0.0703140000000033 | 0.0000100000000032 |
| 0.6108609999999999 | 0.0703140000000033 | 0.0000100000000032 |
| 0.3611289999999983 | 0.2480490000000017 | 0.0000000000000000 |
| 0.8611289999999983 | 0.2480490000000017 | 0.0000000000000000 |
| 0.1108609999999999 | 0.5703140000000033 | 0.0000100000000032 |
| 0.6108609999999999 | 0.5703140000000033 | 0.0000100000000032 |
| 0.3611289999999983 | 0.7480490000000016 | 0.0000000000000000 |
| 0.8611289999999983 | 0.7480490000000016 | 0.0000000000000000 |
| 0.7207569999999990 | 0.3900569999999988 | 0.0449660000000023 |
| 0.2207569999999990 | 0.3900569999999988 | 0.0449660000000023 |
| 0.2207569999999990 | 0.8900569999999987 | 0.0449660000000023 |
| 0.7207569999999990 | 0.8900569999999987 | 0.0449660000000023 |
| 0.4706900000000033 | 0.4281849999999991 | 0.0450099999999978 |
| 0.9706900000000033 | 0.4281849999999991 | 0.0450099999999978 |
| 0.4706900000000033 | 0.9281849999999991 | 0.0450099999999978 |
| 0.9706900000000033 | 0.9281849999999991 | 0.0450099999999978 |
| 0.2502339999999990 | 0.1460379999999972 | 0.0575049999999990 |
| 0.7502339999999976 | 0.1460379999999972 | 0.0575049999999990 |
| 0.0003069999999994 | 0.1722370000000026 | 0.0575270000000003 |
| 0.5003069999999994 | 0.1722370000000026 | 0.0575270000000003 |
| 0.2502339999999990 | 0.6460379999999971 | 0.0575049999999990 |
| 0.7502339999999976 | 0.6460379999999971 | 0.0575049999999990 |
| 0.0003069999999994 | 0.6722370000000026 | 0.0575270000000003 |
| 0.5003069999999994 | 0.6722370000000026 | 0.0575270000000003 |
| 0.1105939999999990 | 0.0078310000000030 | 0.1009559999999965 |
| 0.6105939999999990 | 0.0078310000000030 | 0.1009559999999965 |
| 0.3604309999999983 | 0.3104030000000008 | 0.1009609999999981 |
| 0.8604309999999984 | 0.3104030000000008 | 0.1009609999999981 |
| 0.1105939999999990 | 0.5078310000000030 | 0.1009559999999965 |
| 0.6105939999999990 | 0.5078310000000030 | 0.1009559999999965 |
| 0.3604309999999983 | 0.8104030000000008 | 0.1009609999999981 |
| 0.8604309999999984 | 0.8104030000000008 | 0.1009609999999981 |
| 0.2502730000000000 | 0.1460980000000021 | 0.1443620000000010 |
| 0.7502730000000000 | 0.1460980000000021 | 0.1443620000000010 |
| 0.0002649999999988 | 0.1722340000000031 | 0.1443629999999985 |
| 0.5002649999999988 | 0.1722340000000031 | 0.1443629999999985 |
| 0.2502730000000000 | 0.6460980000000021 | 0.1443620000000010 |
| 0.7502730000000000 | 0.6460980000000021 | 0.1443620000000010 |
| 0.0002649999999988 | 0.6722340000000031 | 0.1443629999999985 |
| 0.5002649999999988 | 0.6722340000000031 | 0.1443629999999985 |
| 0.2207760000000007 | 0.3901219999999981 | 0.1569550000000035 |
| 0.7207760000000006 | 0.3901219999999981 | 0.1569550000000035 |
| 0.4706139999999976 | 0.4281819999999996 | 0.1569470000000024 |



0.970613999999976 0.428181999999996 0.156947000000024  
0.220776000000007 0.890121999999981 0.156955000000035  
0.720776000000006 0.890121999999981 0.156955000000035  
0.470613999999976 0.928181999999996 0.156947000000024  
0.970613999999976 0.928181999999996 0.156947000000024  
0.110970000000018 0.070314000000033 0.201887999999967  
0.610970000000018 0.070314000000033 0.201887999999967  
0.360989000000036 0.247931000000012 0.201898999999974  
0.860989000000036 0.247931000000012 0.201898999999974  
0.110970000000018 0.570314000000033 0.201887999999967  
0.610970000000018 0.570314000000033 0.201887999999967  
0.360989000000036 0.747931000000010 0.201898999999974  
0.860989000000036 0.747931000000010 0.201898999999974  
0.269008999999969 0.402751000000020 0.260770000000008  
0.769008999999968 0.402751000000020 0.260770000000008  
0.019038000000019 0.415444999999982 0.260770000000008  
0.519038000000019 0.415444999999982 0.260770000000008  
0.269008999999969 0.9027509999999807 0.260770000000008  
0.769008999999968 0.9027509999999807 0.260770000000008  
0.019038000000019 0.915444999999983 0.260770000000008  
0.519038000000019 0.915444999999983 0.260770000000008  
0.269004000000025 0.152816000000014 0.262706999999989  
0.769004000000025 0.152816000000014 0.262706999999989  
0.019126000000000 0.165419999999975 0.262704999999969  
0.519126000000000 0.165419999999975 0.262704999999969  
0.269004000000025 0.652816000000014 0.262706999999989  
0.769004000000025 0.652816000000014 0.262706999999989  
0.019126000000000 0.665419999999973 0.262704999999969  
0.519126000000000 0.665419999999973 0.262704999999969  
0.3620880810786302 0.0016871523500933 0.3247057780820885  
0.8616474787073809 0.0014956901584537 0.3245868415361588  
0.1137149357303985 0.3175055207922604 0.3244792386946950  
0.6114875051439207 0.3166618189379828 0.3246104560126233  
0.3643708672955097 0.5052648997800047 0.3241145147095196  
0.8637948524430653 0.5035135398681211 0.3241583644066298  
0.1150868550630673 0.8131044374852737 0.3241681920636457  
0.6126906012177440 0.8148651351241232 0.3242096992478288  
0.2418836474732454 0.1571881313509442 0.3739669434366659  
0.7420860422497254 0.1571785149503417 0.3739350209661091  
0.4916871687292828 0.1609260739636475 0.3735980477505378  
0.9920343153526412 0.1618012975301587 0.3731905659624600  
0.2428411440766327 0.6564465721010388 0.3748242830831975  
0.7417233624526868 0.6573635148058917 0.3736080203980674  
0.4924891505118977 0.6612145479119880 0.3749651189661717

0.9924022519141955 0.6611972354092145 0.3743557978694424  
0.9963521426000846 0.4137232144510339 0.3839354390599635  
0.4955984065972367 0.4133523009007708 0.3839376071753337  
0.9981087782489034 0.9121976595043931 0.3833226111170929  
0.4973934309987183 0.9122095878874175 0.3838963229830207  
0.2479691048939857 0.4062581976899670 0.3839341682048105  
0.7467416485743601 0.4063848395189776 0.3836363453245906  
0.2467146435547163 0.9041612308890220 0.3837618697895325  
0.7462317863843821 0.9046462218557049 0.3838530632345512  
0.3623071449541018 0.0564524818609920 0.4302658124702684  
0.8649490983904946 0.0560620225314517 0.4295340852251667  
0.1119027863971903 0.2594739594503182 0.4296806182874098  
0.6106383499607009 0.2599497449737398 0.4294208014454832  
0.3642843914435424 0.5619525415724902 0.4322319192788562  
0.8591326556664928 0.5637683287823264 0.4302827107718592  
0.6136817184167738 0.7586933033521652 0.4320326043338287  
0.1132195037150174 0.7580024409596466 0.4316814410803344  
0.2538564449264390 0.3927971045704808 0.4727679673529127  
0.7530707980507247 0.3933437583438372 0.471044567773631  
0.0041443830285471 0.4280973716532853 0.4708067448021298  
0.5044627805772408 0.4250797119259459 0.4736061926498744  
0.2546602552086301 0.8909098472608213 0.4729814993435597  
0.7573271116788847 0.8922633979545402 0.4734550437113508  
0.0073033659856470 0.9270322464534202 0.4732613061140048  
0.5048954472671632 0.9242717059324251 0.4735509066923972  
0.4685040085362724 0.1810439039007789 0.4855546756078748  
0.9643915299261584 0.1869316637069154 0.4849941439119109  
0.4718919109231564 0.6791043433260554 0.4890653776029595  
0.9679559789260729 0.6816936721518467 0.4867048559602606  
0.2152948068683221 0.1371167869990177 0.4847676528599468  
0.7173613764243552 0.1347036496957383 0.4842116777125333  
0.2188660031517431 0.6344398510366992 0.4883144530664103  
0.7179530818473381 0.6364277991283632 0.4880431179893260  
0.1022499748962149 0.3277188399457197 0.5289496657062844  
0.6204029997282869 0.3197637632315731 0.5294289852437863  
0.1137662015357147 0.8248400076274214 0.5314111071793238  
0.6221721650475639 0.8336323809868021 0.5317534056946197  
0.3632600583648061 0.4836988237445678 0.5315554181579746  
0.8611333099129320 0.4846338967994085 0.5286228333606200  
0.3520283690596103 0.9990872421920917 0.5295252435790773  
0.8663550667450024 0.0040623749227320 0.5297618496675952  
0.9965065519159674 0.1790706978430640 0.5948016006787106  
0.4770182776243699 0.2032027278703104 0.6096844771394059  
0.0163145476439216 0.6738534697524715 0.5954229869826257

0.2391663321675291 0.1170784123608073 0.6042028201557449  
0.7341421244979727 0.1499578323745159 0.6003035737094123  
0.2669219809119623 0.6298855589054629 0.5968024799376824  
0.7817021948610858 0.6484458450035518 0.5834127569086790  
0.0199006759704972 0.4203286013356126 0.5902855708548623  
0.5360463343886592 0.4218842493510983 0.5888811106990918  
0.0240600461244981 0.9200147039751816 0.5940169662068826  
0.5140954831076217 0.9608364860955029 0.5849970492309131  
0.2599653385763177 0.3726982551140533 0.5863766936162637  
0.7757106056272250 0.4024314551603683 0.5897972079879836  
0.2819998402821011 0.8876620992121902 0.5915181080610745  
0.7806970801720235 0.9156455855075167 0.5900508370038523  
0.3814569999999975 0.0360170000000011 0.1009499999999974  
0.8814569999999975 0.0360170000000011 0.1009499999999974  
0.1314539999999980 0.2821670000000012 0.1009409999999988  
0.6314539999999980 0.2821670000000012 0.1009409999999988  
0.3814569999999975 0.5360170000000011 0.1009499999999974  
0.8814569999999975 0.5360170000000011 0.1009499999999974  
0.1314539999999980 0.7821670000000011 0.1009409999999988  
0.6314539999999980 0.7821670000000011 0.1009409999999988  
0.6272508168794515 0.0334072492069941 0.4260069507967031  
0.1291793371220178 0.0319686260602044 0.4258770605982811  
0.1294213986471258 0.5346140680657858 0.4254109416373423  
0.6263782675320425 0.5329853027300049 0.4257836593133683  
0.3776982712931617 0.2824928466249734 0.4259477681191979  
0.8768337478382564 0.2829634971736912 0.4251370690038583  
0.3778960062972833 0.7873950674853963 0.4260547459935815  
0.8796583109072744 0.7880230206052644 0.4258737327610128  
0.1265810000000016 0.0331339999999969 0.0467230000000001  
0.6265810000000016 0.0331339999999969 0.0467230000000001  
0.3766129999999989 0.2849610000000026 0.0467140000000015  
0.8766129999999990 0.2849610000000026 0.0467140000000015  
0.1265810000000016 0.5331339999999969 0.0467230000000001  
0.6265810000000016 0.5331339999999969 0.0467230000000001  
0.3766129999999989 0.7849610000000026 0.0467140000000015  
0.8766129999999990 0.7849610000000026 0.0467140000000015  
0.6266579999999990 0.0332689999999971 0.1551869999999980  
0.1266579999999990 0.0332689999999971 0.1551869999999980  
0.3765950000000018 0.2850719999999995 0.1551660000000012  
0.8765950000000018 0.2850719999999995 0.1551660000000012  
0.1266579999999990 0.5332689999999970 0.1551869999999980  
0.6266579999999990 0.5332689999999970 0.1551869999999980  
0.3765950000000018 0.7850719999999978 0.1551660000000012  
0.8765950000000018 0.7850719999999978 0.1551660000000012

0.3698818889239219 0.0322233393100533 0.3714138606607337  
0.8702621470261980 0.0323730469854275 0.3712920468505728  
0.1200288911020026 0.2863103618249609 0.3710790545319199  
0.6196721948759111 0.2856982646844272 0.3713315072872347  
0.3705592791610952 0.5322309042842660 0.3706524493357539  
0.8697085446231634 0.5326980206544096 0.3707629377685421  
0.1205649550058023 0.7855240585206500 0.3707959697228129  
0.6201565673185819 0.7862626194922625 0.3707309550789977  
0.3785931673828058 0.0354743086367506 0.4819862775947405  
0.8813494601330953 0.0370595074578930 0.4809337000245296  
0.1284714689847798 0.2818590332225040 0.4797100533387366  
0.6293535777335663 0.2807766335484161 0.4803618560479104  
0.3802536985280403 0.5378628057747491 0.4814128625031753  
0.8794846916860660 0.5379960868893175 0.4794260403814520  
0.1302905625184145 0.7805786128065640 0.4820791158217588  
0.6304756769593178 0.7831596873057660 0.4815918707694170  
0.1580489999999983 0.2694120000000026 0.2292950000000005  
0.6580489999999983 0.2694120000000026 0.2292950000000005  
0.1580489999999983 0.7694120000000026 0.2292950000000005  
0.6580489999999983 0.7694120000000026 0.2292950000000005  
0.4078700000000026 0.0492119999999971 0.2293179999999992  
0.9078700000000026 0.0492119999999971 0.2293179999999992  
0.4078700000000026 0.5492119999999971 0.2293179999999992  
0.9078700000000026 0.5492119999999971 0.2293179999999992  
0.6577989999999971 0.0193160000000034 0.2941629999999975  
0.1577989999999971 0.0193160000000034 0.2941629999999975  
0.4080250000000021 0.2991209999999995 0.2941769999999977  
0.9080250000000021 0.2991209999999995 0.2941769999999977  
0.1577989999999971 0.5193160000000034 0.2941629999999975  
0.6577989999999971 0.5193160000000034 0.2941629999999975  
0.4080250000000021 0.7991209999999978 0.2941769999999977  
0.9080250000000021 0.7991209999999978 0.2941769999999977  
0.1707304570094129 0.0038285141801433 0.5550282667707301  
0.6742650429845887 0.0225952680050440 0.5529125720097638  
0.4261035928720005 0.3070239878650887 0.5563262803389716  
0.9186608286482786 0.3022582793342721 0.5507224634583431  
0.1768435288506944 0.5131601475523038 0.5546298928608967  
0.6737838882189001 0.5172187755802793 0.5505412046993067  
0.4453899779259830 0.7935739360622646 0.5616266820166309  
0.9124137952822310 0.8016698014140381 0.5578503616562104  
0.4008768429377539 0.0307330948249541 0.6239630955362115  
0.8871813927897932 0.0389581437795534 0.6198405554451478  
0.1421675422494362 0.2784846967997408 0.6197338273358767  
0.6381987848333269 0.3039790980602602 0.6226472763447051

0.3531808882341553 0.5686511738203571 0.6463934348644678  
0.8885234023537519 0.5433440837734330 0.6166262559984046  
0.1615479849840214 0.7702485775722743 0.6222949939812579  
0.5660866876338229 0.7124790320036604 0.6313442158523042

**SBNO-UT-3**

AutoCreatByScript: O Sr Nb Bi

1.000000000000000

11.1374600000000008 0.0000000000000000 0.0000000000000000  
0.0000000000000000 11.0636399999999995 0.0000000000000000  
0.0000000000000000 0.0000000000000000 39.0322299999999984

O Sr Nb Bi

143 16 32 32

Selective dynamics

Direct

0.1108609999999999 0.0703140000000033 0.0000100000000032  
0.6108609999999999 0.0703140000000033 0.0000100000000032  
0.3611289999999983 0.2480490000000017 0.0000000000000000  
0.8611289999999983 0.2480490000000017 0.0000000000000000  
0.1108609999999999 0.5703140000000033 0.0000100000000032  
0.6108609999999999 0.5703140000000033 0.0000100000000032  
0.3611289999999983 0.7480490000000016 0.0000000000000000  
0.8611289999999983 0.7480490000000016 0.0000000000000000  
0.7207569999999990 0.3900569999999988 0.0449660000000023  
0.2207569999999990 0.3900569999999988 0.0449660000000023  
0.2207569999999990 0.8900569999999987 0.0449660000000023  
0.7207569999999990 0.8900569999999987 0.0449660000000023  
0.4706990000000033 0.4281849999999991 0.0450099999999978  
0.9706990000000033 0.4281849999999991 0.0450099999999978  
0.4706990000000033 0.9281849999999991 0.0450099999999978  
0.9706990000000033 0.9281849999999991 0.0450099999999978  
0.2502339999999990 0.1460379999999972 0.0575049999999990  
0.7502340000000061 0.1460379999999972 0.0575049999999990  
0.0003069999999994 0.1722370000000026 0.0575270000000003  
0.5003069999999994 0.1722370000000026 0.0575270000000003  
0.2502339999999990 0.6460379999999971 0.0575049999999990  
0.7502340000000061 0.6460379999999971 0.0575049999999990  
0.0003069999999994 0.6722370000000026 0.0575270000000003  
0.5003069999999994 0.6722370000000026 0.0575270000000003  
0.1105939999999990 0.0078310000000030 0.1009559999999965  
0.6105939999999990 0.0078310000000030 0.1009559999999965  
0.3604309999999983 0.3104030000000008 0.1009609999999981  
0.8604309999999984 0.3104030000000008 0.1009609999999981  
0.1105939999999990 0.5078310000000030 0.1009559999999965

0.6105939999999990 0.5078310000000030 0.1009559999999965  
0.3604309999999983 0.8104030000000008 0.1009609999999981  
0.8604309999999984 0.8104030000000008 0.1009609999999981  
0.2502730000000000 0.1460980000000021 0.1443620000000010  
0.7502730000000000 0.1460980000000021 0.1443620000000010  
0.0002649999999988 0.1722340000000031 0.1443629999999985  
0.5002649999999988 0.1722340000000031 0.1443629999999985  
0.2502730000000000 0.6460980000000021 0.1443620000000010  
0.7502730000000000 0.6460980000000021 0.1443620000000010  
0.0002649999999988 0.6722340000000031 0.1443629999999985  
0.5002649999999988 0.6722340000000031 0.1443629999999985  
0.2207760000000007 0.3901219999999981 0.1569550000000035  
0.7207760000000006 0.3901219999999981 0.1569550000000035  
0.4706139999999976 0.4281819999999996 0.1569470000000024  
0.9706139999999976 0.4281819999999996 0.1569470000000024  
0.2207760000000007 0.8901219999999981 0.1569550000000035  
0.7207760000000006 0.8901219999999981 0.1569550000000035  
0.4706139999999976 0.9281819999999996 0.1569470000000024  
0.9706139999999976 0.9281819999999996 0.1569470000000024  
0.1109700000000018 0.0703140000000033 0.2018879999999967  
0.6109700000000018 0.0703140000000033 0.2018879999999967  
0.3609890000000036 0.2479310000000012 0.2018989999999974  
0.8609890000000036 0.2479310000000012 0.2018989999999974  
0.1109700000000018 0.5703140000000033 0.2018879999999967  
0.6109700000000018 0.5703140000000033 0.2018879999999967  
0.3609890000000036 0.74793099999999870 0.2018989999999974  
0.8609890000000036 0.74793099999999870 0.2018989999999974  
0.2690089999999969 0.4027510000000020 0.2607700000000008  
0.7690089999999968 0.4027510000000020 0.2607700000000008  
0.0190380000000019 0.4154449999999982 0.2607700000000008  
0.5190380000000019 0.4154449999999982 0.2607700000000008  
0.2690089999999969 0.90275099999999807 0.2607700000000008  
0.7690089999999968 0.90275099999999807 0.2607700000000008  
0.0190380000000019 0.9154449999999983 0.2607700000000008  
0.5190380000000019 0.9154449999999983 0.2607700000000008  
0.2690040000000025 0.1528160000000014 0.2627069999999989  
0.7690040000000025 0.1528160000000014 0.2627069999999989  
0.0191260000000000 0.1654199999999975 0.2627049999999969  
0.5191260000000000 0.1654199999999975 0.2627049999999969  
0.2690040000000025 0.6528160000000014 0.2627069999999989  
0.7690040000000025 0.6528160000000014 0.2627069999999989  
0.0191260000000000 0.6654199999999973 0.2627049999999969  
0.5191260000000000 0.6654199999999973 0.2627049999999969  
0.3649624973978556 0.0047233403504281 0.3234106678424848

0.8638219430430983 0.0050711433235817 0.3238036398501771  
0.1157359394371714 0.3139431503924514 0.3234657348946925  
0.6174903247421899 0.3106188013874180 0.3229704446586452  
0.3632584934635105 0.5079453283077672 0.3229920352019987  
0.8648139000371740 0.5048603054382078 0.3233129250166334  
0.1181947830674074 0.8109642803823075 0.3238687124038552  
0.6157812245034353 0.8142017229730993 0.3234818818164673  
0.2437010448175284 0.1580351658880799 0.3734242673622164  
0.7431840918649588 0.1577498014953971 0.3747300394347849  
0.4939538982863602 0.1597783921166895 0.3736887647545768  
0.9935230487152987 0.1608479171863371 0.3735050006801076  
0.2454717550353542 0.6569585687053741 0.3768153010388075  
0.7432320883345711 0.6575201668401054 0.3736198018218581  
0.4930866995429841 0.6604918818965960 0.3733785708094500  
0.9940027206514249 0.6596443268929887 0.3734719163999688  
0.9961886516838637 0.4116271174102297 0.3829417961253435  
0.4960465077294267 0.4112458481771125 0.3811016346507198  
0.9971776921593969 0.9112543999864935 0.3829263876378029  
0.4963584406297969 0.9115722841317472 0.3831051722478932  
0.2464613267207655 0.4077948241033502 0.3831071293390446  
0.7463631017264273 0.4060130952752076 0.3827263438493929  
0.2471243774446556 0.9063639866927518 0.3830922140363376  
0.7462605237738770 0.9063005404328477 0.3833100629617989  
0.3628273825531250 0.0588168811633863 0.4296076309544952  
0.8647946896374527 0.0596319447196751 0.4295545299799902  
0.1138165336965970 0.2592586487096887 0.4295424605248437  
0.6055445335122632 0.2674538528106797 0.4300642488060227  
0.3818010591296522 0.5468488898613834 0.4315740673064974  
0.8634641136032587 0.5581252582049950 0.4294417160860337  
0.6127239614722976 0.7577772565807399 0.4295525795798896  
0.1126935651209766 0.7595279575203870 0.4297618993583145  
0.2564513028949148 0.3912662839252088 0.4723078501649001  
0.7442277069116342 0.3999306804519087 0.4714471421375117  
0.0028383717122087 0.4223849382871456 0.4716712777584511  
0.2589788450717159 0.8899052297711088 0.4720213306749124  
0.7563426513105547 0.8939835857500003 0.4711460549216924  
0.0067054852395201 0.9252213626999132 0.4716939012623319  
0.5052983978701815 0.9227880910933057 0.4718786340663403  
0.4718748328793070 0.1777684298185870 0.4856860377704552  
0.9698894449099852 0.1800646257734883 0.4864001291516404  
0.4812798603620812 0.6675259776325633 0.4866693131199408  
0.9759491220309704 0.6755657424312073 0.4857497722590102  
0.2185456568635469 0.1356099209940745 0.4863034201098038  
0.7175503733492969 0.1354637126494173 0.4847628885121996

0.2199099862353108 0.6349830901040632 0.4854015677987528  
0.7293140124622144 0.6451207615095210 0.4864021085600764  
0.1098932886512613 0.3258439743843863 0.5294902649950557  
0.6049695474040399 0.3332456194883584 0.5279891088408671  
0.1099710690873688 0.8265127362948490 0.5295878044031144  
0.6093751790987443 0.8249375811167634 0.5293572165191188  
0.3616774882816888 0.4924203607316619 0.5302237472145213  
0.8600804508719385 0.4908743749147562 0.5291808275046758  
0.3610696157925272 0.9932982552142213 0.5298103340309529  
0.8595498123875301 0.9911734016536975 0.5291381936214867  
0.0243996393523636 0.1605069267578354 0.5855949690415443  
0.5234841272830784 0.1568514206601511 0.5854615547852376  
0.0236910110870560 0.6557975043615536 0.5877786120902038  
0.5245906024144150 0.6609623152785745 0.5855241569073287  
0.2718972255341136 0.1591246062348088 0.5885368651852431  
0.7734812676759258 0.1609575019523371 0.5851176777131858  
0.2737692728692975 0.6606149509597000 0.5858921729293713  
0.7740090428860383 0.6594155348307440 0.5882126392713068  
0.0163744117489920 0.4066293381286534 0.5901809071812351  
0.5189847794041301 0.4081869475161841 0.5900124450368880  
0.0191934152913498 0.9069175498985271 0.5919836506572277  
0.5179593161879467 0.9064602445915440 0.5904390034800252  
0.2641940135173742 0.4113590093118057 0.5915761313895802  
0.7696036129417828 0.4125776368375752 0.5904558674036742  
0.2711276830434197 0.9116847841577762 0.5914070890959978  
0.7662695776224651 0.9113771466834043 0.5913367456139552  
0.381456999999975 0.036017000000011 0.100949999999974  
0.881456999999975 0.036017000000011 0.100949999999974  
0.131453999999980 0.282167000000012 0.100940999999988  
0.631453999999980 0.282167000000012 0.100940999999988  
0.381456999999975 0.536017000000011 0.100949999999974  
0.881456999999975 0.536017000000011 0.100949999999974  
0.131453999999980 0.782167000000011 0.100940999999988  
0.631453999999980 0.782167000000011 0.100940999999988  
0.6244324092600881 0.0352236776714893 0.4244642753039379  
0.1262778350247274 0.0339006814924509 0.4245047707313310  
0.1230143379237562 0.5325084622682992 0.4246087762635666  
0.6250661598968348 0.5332276656126423 0.4234251196047579  
0.3741598101878387 0.2852729613679614 0.4242184429101140  
0.8764009572698830 0.2866881471740291 0.4248135408316860  
0.3763204713136137 0.7835743520532461 0.4240631115591081  
0.8753413517359602 0.7840898128989504 0.4242455844599869  
0.1265810000000016 0.0331339999999969 0.0467230000000001  
0.6265810000000016 0.0331339999999969 0.0467230000000001



0.376612999999989 0.284961000000026 0.046714000000015  
0.876612999999990 0.284961000000026 0.046714000000015  
0.1265810000000016 0.533133999999969 0.046723000000001  
0.6265810000000016 0.533133999999969 0.046723000000001  
0.376612999999989 0.784961000000026 0.046714000000015  
0.876612999999990 0.784961000000026 0.046714000000015  
0.626657999999990 0.033268999999971 0.155186999999980  
0.126657999999990 0.033268999999971 0.155186999999980  
0.376595000000018 0.285071999999995 0.155166000000012  
0.876595000000018 0.285071999999995 0.155166000000012  
0.126657999999990 0.533268999999970 0.155186999999980  
0.626657999999990 0.533268999999970 0.155186999999980  
0.376595000000018 0.7850719999999709 0.155166000000012  
0.876595000000018 0.7850719999999709 0.155166000000012  
0.3707024926689222 0.0324660572031016 0.3698915983159856  
0.8706780066762381 0.0326912042671707 0.3702906485806983  
0.1206076271422661 0.2855689361113389 0.3699071430551704  
0.6208669845578025 0.2852144991134990 0.3695047684197665  
0.3712464675199150 0.5318258021503882 0.3694346228837282  
0.8706359630100167 0.5322251762318182 0.3698176440053823  
0.1212267464479221 0.7853419525236767 0.3704297436656623  
0.6209038440885570 0.7862557597967191 0.3699349761118734  
0.3738683378185185 0.0350414202863198 0.4791991246799781  
0.8743497344844714 0.0356616787983303 0.4792122934474050  
0.1251189278843283 0.2829732224968708 0.4793687232576152  
0.6253825339588517 0.2805334018985399 0.4798341674970864  
0.3667570396128064 0.5425504007530113 0.4808610883042357  
0.8743833611321898 0.5378899761429338 0.4794696670145344  
0.1215689988394576 0.7865519741589334 0.4793092000421436  
0.6267184240779098 0.7844902069339416 0.4790282512958593  
0.158048999999983 0.269412000000026 0.229295000000005  
0.658048999999983 0.269412000000026 0.229295000000005  
0.158048999999983 0.769412000000026 0.229295000000005  
0.658048999999983 0.769412000000026 0.229295000000005  
0.407870000000026 0.049211999999971 0.229317999999992  
0.907870000000026 0.049211999999971 0.229317999999992  
0.407870000000026 0.549211999999971 0.229317999999992  
0.907870000000026 0.549211999999971 0.229317999999992  
0.657798999999971 0.019316000000034 0.294162999999975  
0.157798999999971 0.019316000000034 0.294162999999975  
0.408025000000021 0.299120999999995 0.294176999999977  
0.908025000000021 0.299120999999995 0.294176999999977  
0.157798999999971 0.519316000000034 0.294162999999975  
0.657798999999971 0.519316000000034 0.294162999999975

0.4080250000000021 0.7991209999999709 0.2941769999999977  
0.9080250000000021 0.7991209999999709 0.2941769999999977  
0.1722642539761380 0.0189293879754607 0.5511474808898789  
0.6689454780257924 0.0162282059052135 0.5505939599423211  
0.4169997523662726 0.3038088463248725 0.5496362151239358  
0.9193737096888085 0.2986653891565054 0.5491028610211779  
0.1661386480410831 0.5180370961040527 0.5519995867782005  
0.6700198410927164 0.5218596967945187 0.5506999614374675  
0.4190101509354983 0.8011535170654576 0.5500884502377930  
0.9207071691324644 0.8023333967314157 0.5522328634897327  
0.4027931227610110 0.0447792790205011 0.6157083368180297  
0.8979637499108222 0.0493304063413511 0.6154438567351224  
0.1440505291141551 0.2746752898589268 0.6159793727387174  
0.6486062878759176 0.2731214239951493 0.6147339861800386  
0.4004967947457944 0.5472508353367732 0.6153750231939726  
0.8987006150651022 0.5399458496991607 0.6160085267653109  
0.1529613794056321 0.7732593698110203 0.6161692385722627  
0.6449925741539161 0.7743228701448438 0.6159844786344516

#### SBNO-UT-4

AutoCreatByScript: O Sr Nb Bi

1.0000000000000000

11.1374600000000008 0.0000000000000000 0.0000000000000000  
0.0000000000000000 11.0636399999999995 0.0000000000000000  
0.0000000000000000 0.0000000000000000 39.0322299999999984

O Sr Nb Bi

143 16 32 32

Selective dynamics

Direct

0.1108609999999999 0.0703140000000033 0.0000100000000032  
0.6108609999999999 0.0703140000000033 0.0000100000000032  
0.3611289999999983 0.2480490000000017 0.0000000000000000  
0.8611289999999983 0.2480490000000017 0.0000000000000000  
0.1108609999999999 0.5703140000000033 0.0000100000000032  
0.6108609999999999 0.5703140000000033 0.0000100000000032  
0.3611289999999983 0.7480490000000016 0.0000000000000000  
0.8611289999999983 0.7480490000000016 0.0000000000000000  
0.7207569999999990 0.3900569999999988 0.0449660000000023  
0.2207569999999990 0.3900569999999988 0.0449660000000023  
0.2207569999999990 0.8900569999999987 0.0449660000000023  
0.7207569999999990 0.8900569999999987 0.0449660000000023  
0.4706990000000033 0.4281849999999991 0.0450099999999978  
0.9706990000000033 0.4281849999999991 0.0450099999999978  
0.4706990000000033 0.9281849999999991 0.0450099999999978

0.9706990000000033 0.9281849999999991 0.0450099999999978  
0.2502339999999990 0.1460379999999972 0.0575049999999990  
0.75023400000000131 0.1460379999999972 0.0575049999999990  
0.0003069999999994 0.1722370000000026 0.0575270000000003  
0.5003069999999994 0.1722370000000026 0.0575270000000003  
0.2502339999999990 0.6460379999999971 0.0575049999999990  
0.75023400000000131 0.6460379999999971 0.0575049999999990  
0.0003069999999994 0.6722370000000026 0.0575270000000003  
0.5003069999999994 0.6722370000000026 0.0575270000000003  
0.1105939999999990 0.0078310000000030 0.1009559999999965  
0.6105939999999990 0.0078310000000030 0.1009559999999965  
0.3604309999999983 0.3104030000000008 0.1009609999999981  
0.8604309999999984 0.3104030000000008 0.1009609999999981  
0.1105939999999990 0.5078310000000030 0.1009559999999965  
0.6105939999999990 0.5078310000000030 0.1009559999999965  
0.3604309999999983 0.8104030000000008 0.1009609999999981  
0.8604309999999984 0.8104030000000008 0.1009609999999981  
0.2502730000000000 0.1460980000000021 0.1443620000000010  
0.7502730000000000 0.1460980000000021 0.1443620000000010  
0.0002649999999988 0.1722340000000031 0.1443629999999985  
0.5002649999999988 0.1722340000000031 0.1443629999999985  
0.2502730000000000 0.6460980000000021 0.1443620000000010  
0.7502730000000000 0.6460980000000021 0.1443620000000010  
0.0002649999999988 0.6722340000000031 0.1443629999999985  
0.5002649999999988 0.6722340000000031 0.1443629999999985  
0.2207760000000007 0.3901219999999981 0.1569550000000035  
0.7207760000000006 0.3901219999999981 0.1569550000000035  
0.4706139999999976 0.4281819999999996 0.1569470000000024  
0.9706139999999976 0.4281819999999996 0.1569470000000024  
0.2207760000000007 0.8901219999999981 0.1569550000000035  
0.7207760000000006 0.8901219999999981 0.1569550000000035  
0.4706139999999976 0.9281819999999996 0.1569470000000024  
0.9706139999999976 0.9281819999999996 0.1569470000000024  
0.1109700000000018 0.0703140000000033 0.2018879999999967  
0.6109700000000018 0.0703140000000033 0.2018879999999967  
0.3609890000000036 0.2479310000000012 0.2018989999999974  
0.8609890000000036 0.2479310000000012 0.2018989999999974  
0.1109700000000018 0.5703140000000033 0.2018879999999967  
0.6109700000000018 0.5703140000000033 0.2018879999999967  
0.3609890000000036 0.7479310000000082 0.2018989999999974  
0.8609890000000036 0.7479310000000082 0.2018989999999974  
0.2690089999999969 0.4027510000000020 0.2607700000000008  
0.7690089999999968 0.4027510000000020 0.2607700000000008  
0.0190380000000019 0.4154449999999982 0.2607700000000008

0.5190380000000019 0.4154449999999982 0.2607700000000008  
0.2690089999999969 0.9027510000000163 0.2607700000000008  
0.7690089999999968 0.9027510000000163 0.2607700000000008  
0.0190380000000019 0.9154449999999983 0.2607700000000008  
0.5190380000000019 0.9154449999999983 0.2607700000000008  
0.2690040000000025 0.1528160000000014 0.2627069999999989  
0.7690040000000025 0.1528160000000014 0.2627069999999989  
0.0191260000000000 0.1654199999999975 0.2627049999999969  
0.5191260000000000 0.1654199999999975 0.2627049999999969  
0.2690040000000025 0.6528160000000014 0.2627069999999989  
0.7690040000000025 0.6528160000000014 0.2627069999999989  
0.0191260000000000 0.6654199999999973 0.2627049999999969  
0.5191260000000000 0.6654199999999973 0.2627049999999969  
0.3631019815725573 0.0045476255513392 0.3242360426410330  
0.8600734511130316 0.0015011968266236 0.3250275685451098  
0.1151095350770564 0.3167796550820589 0.3246207247945469  
0.6118110454945237 0.3152742661524041 0.3243378864501171  
0.3622067061841762 0.5037406520546984 0.3240999740457464  
0.8647110560258107 0.5070391027092369 0.3236631116993156  
0.1144150263782191 0.8112989893058293 0.3236780338305678  
0.6178065190851508 0.8144975935621217 0.3238068590110708  
0.2435135697085635 0.1595100671588103 0.3747964641749598  
0.7421529933316510 0.1581265133127364 0.3745926657288146  
0.4932697895709900 0.1604911067313984 0.3746252941286840  
0.9924826981999297 0.1604736332555513 0.3733129789186032  
0.2436670995122850 0.6577671127982639 0.3751051618219966  
0.7431257481579085 0.6591522999485873 0.3747350654666270  
0.4931261732988168 0.6600956384106601 0.3726780970518154  
0.9935982664896597 0.6605901150636854 0.3750765923504138  
0.9942669205968916 0.4127546876520122 0.3835055086830218  
0.4934560767154950 0.4118567503354035 0.3839997815271559  
0.9964255684119003 0.9108619653125872 0.3834701299683979  
0.4967543470485469 0.9104327042771450 0.3831298923689155  
0.2463060241519848 0.4086198945072032 0.3852344885045142  
0.7458112582843189 0.4084070824515963 0.3826024749559636  
0.2441945767259252 0.9069905167567170 0.3825634264147137  
0.7438870695257530 0.9059957773504603 0.3855036784636699  
0.3664123801155615 0.0491003768770444 0.4290494677168519  
0.8679094256688001 0.0600981876598268 0.4303222285412084  
0.1087494988367943 0.2604396711079336 0.4295495892566291  
0.6170276177844835 0.2671675729745055 0.4297116194787277  
0.3741722150142988 0.5708918331511127 0.4331014078977234  
0.8621709957824589 0.5603160519284215 0.4305299090610463  
0.6038770806110224 0.7486269758570298 0.4321907464089348

0.1197668887210190 0.7602275744068190 0.4313455977974437  
0.2529827147723359 0.3998847948332676 0.4708828174601620  
0.7559945519667817 0.3955023155835892 0.4733028920721095  
0.0049490068232133 0.4229427058776695 0.4716425079269914  
0.5065776571896389 0.4277801295910880 0.4753807529153615  
0.2554288082356945 0.8962341592793569 0.4751638725561921  
0.7541835286799943 0.8961003171535127 0.4702185405754870  
0.0038910150771092 0.9205259652436016 0.4723966499475713  
0.5025162735249559 0.9131665364686624 0.4749988241562914  
0.4830032877840105 0.1718608817448195 0.4821096276653394  
0.9799759462640197 0.1729596550892240 0.4881282444633473  
0.9797939024134615 0.6717692211268202 0.4873297965646264  
0.2316785886600650 0.1493183263053784 0.4820705373567698  
0.7299160204633827 0.1442569874702841 0.4858710495307514  
0.2340078057173090 0.6473366571143969 0.4905600765025741  
0.7248504936884046 0.6411446700470295 0.4890635171164213  
0.1114250262089677 0.3254678817207269 0.5301154481302948  
0.6083490085625475 0.3183570597434843 0.5313623364933966  
0.1070824171654060 0.8310689290284519 0.5317704159805421  
0.6208637558923387 0.8267602177633644 0.5308452859064129  
0.3576589142917597 0.4882461498401174 0.5320922159184346  
0.8661414968539684 0.4869909957060440 0.5307371217455417  
0.3604477950271484 0.0200152077760038 0.5310042479347972  
0.8565667858536598 0.9872141108032266 0.5299614523959008  
0.0223633138184830 0.1576401727222905 0.5898218070484963  
0.5198297737780770 0.1651256547020929 0.5918368423680287  
0.0186333587219539 0.6583469552159604 0.5906276830193778  
0.5208390859663417 0.6565445576903269 0.5790467418578410  
0.2754280618351264 0.1611375640542705 0.5917095073200016  
0.7695480728127495 0.1542847425284513 0.5909770040717873  
0.2676430857307627 0.6604543968252042 0.5862364878213787  
0.7664915733425010 0.6502076147119616 0.5875145754216086  
0.0155249099247628 0.4049995579815400 0.5916839940118730  
0.5188733547993986 0.4088429655528559 0.5929321995628923  
0.0171180278425107 0.9040930458099639 0.5933450626563179  
0.5309624957217538 0.9196021415463926 0.5940203015325993  
0.2647693972770727 0.4114097972566478 0.5924081402324231  
0.7692833554783480 0.4041920900518457 0.5901082307310453  
0.2622547695733902 0.9194200797786845 0.5954865807894759  
0.7725876839834377 0.9047550466092461 0.5918021503393548  
0.3814569999999975 0.0360170000000011 0.1009499999999974  
0.8814569999999975 0.0360170000000011 0.1009499999999974  
0.1314539999999980 0.2821670000000012 0.1009409999999988  
0.6314539999999980 0.2821670000000012 0.1009409999999988

0.381456999999975 0.536017000000011 0.100949999999974  
0.881456999999975 0.536017000000011 0.100949999999974  
0.131453999999980 0.782167000000011 0.100940999999988  
0.631453999999980 0.782167000000011 0.100940999999988  
0.6200735717461093 0.0373619515994392 0.4263018399770532  
0.1252177615882330 0.0324053167040722 0.4256613897647306  
0.1217513077089961 0.5351308351797291 0.4248029881034344  
0.6235132754739174 0.5275476911821316 0.4255103049539340  
0.3741430018577822 0.2770388213281346 0.4255369283370094  
0.8705992446445180 0.2857314833884636 0.4249173137277442  
0.3704089323373168 0.7922969023241498 0.424995201731021  
0.8797821895979473 0.7850882649237657 0.4249004129869945  
0.1265810000000016 0.0331339999999969 0.0467230000000001  
0.6265810000000016 0.0331339999999969 0.0467230000000001  
0.3766129999999989 0.2849610000000026 0.0467140000000015  
0.8766129999999990 0.2849610000000026 0.0467140000000015  
0.1265810000000016 0.5331339999999969 0.0467230000000001  
0.6265810000000016 0.5331339999999969 0.0467230000000001  
0.3766129999999989 0.7849610000000026 0.0467140000000015  
0.8766129999999990 0.7849610000000026 0.0467140000000015  
0.6266579999999990 0.0332689999999971 0.1551869999999980  
0.1266579999999990 0.0332689999999971 0.1551869999999980  
0.3765950000000018 0.2850719999999995 0.1551660000000012  
0.8765950000000018 0.2850719999999995 0.1551660000000012  
0.1266579999999990 0.5332689999999970 0.1551869999999980  
0.6266579999999990 0.5332689999999970 0.1551869999999980  
0.3765950000000018 0.7850720000000138 0.1551660000000012  
0.8765950000000018 0.7850720000000138 0.1551660000000012  
0.3697861471274311 0.0330004628566369 0.3710401988498144  
0.8686116299161031 0.0322714254104267 0.3715294052865994  
0.1191057816283850 0.2864885617334877 0.3711757380982154  
0.6191420604175594 0.2862239959649799 0.3709769925638989  
0.3698470587984863 0.5325057396118640 0.3703683715908905  
0.8691534150529804 0.5335095479980076 0.3702640925070330  
0.1202415800412190 0.7858859820199541 0.3702393450297150  
0.6194666335698629 0.7860080592567568 0.3701522983729898  
0.3704756889531197 0.0343784055329029 0.4813307774319113  
0.8725940932635661 0.0359081022034498 0.4805189279218065  
0.1173563074458249 0.2809302931482420 0.4792235930026404  
0.6227308060414054 0.2822641294075952 0.4807913906973239  
0.3652579737686007 0.5251046008833409 0.4803436647770939  
0.8735137594529331 0.5325476256258330 0.4797056101136836  
0.1206588263364329 0.7850327060777401 0.4811862884423913  
0.6314528610312058 0.7851169630892610 0.4793152517469483

0.158048999999983 0.269412000000026 0.229295000000005  
0.658048999999983 0.269412000000026 0.229295000000005  
0.158048999999983 0.769412000000026 0.229295000000005  
0.658048999999983 0.769412000000026 0.229295000000005  
0.407870000000026 0.049211999999971 0.229317999999992  
0.907870000000026 0.049211999999971 0.229317999999992  
0.407870000000026 0.549211999999971 0.229317999999992  
0.907870000000026 0.549211999999971 0.229317999999992  
0.657798999999971 0.019316000000034 0.294162999999975  
0.157798999999971 0.019316000000034 0.294162999999975  
0.408025000000021 0.299120999999995 0.294176999999977  
0.908025000000021 0.299120999999995 0.294176999999977  
0.157798999999971 0.519316000000034 0.294162999999975  
0.657798999999971 0.519316000000034 0.294162999999975  
0.408025000000021 0.7991210000000137 0.294176999999977  
0.908025000000021 0.7991210000000137 0.294176999999977  
0.1770184884881600 0.0180134498560396 0.5529038875370357  
0.6613753319619227 0.0122745304240835 0.5538482152798315  
0.4186368064546550 0.2963485751945445 0.5541291910186935  
0.9221755058171286 0.2969734770512600 0.5505012723793126  
0.1682161151662294 0.5185117817828153 0.5509883329080468  
0.6718045321700982 0.5166974460298150 0.5481948194421679  
0.4299570474781380 0.7576017410732812 0.5340127122486414  
0.9181566987374210 0.8020668091149945 0.5518745493461479  
0.4012349574790717 0.0355942224742942 0.6188330937941681  
0.8971359497964195 0.0382915818506619 0.6177236288305353  
0.1467852714670440 0.2776035546122587 0.6175949003406721  
0.6509265878026019 0.2797714792781603 0.6177324794536668  
0.4018332524995171 0.5545806826672113 0.6143035879811938  
0.8927213301865083 0.5384907833772707 0.6160297912954437  
0.1509819233420144 0.7747044877338519 0.6169012037993992  
0.6355885666563428 0.7697696484205914 0.6149245315587737

**SBNO(001)-UT-5**

AutoCreatByScript: O Sr Nb Bi

1.000000000000000

11.1374600000000008 0.000000000000000 0.000000000000000

0.000000000000000 11.063639999999995 0.000000000000000

0.000000000000000 0.000000000000000 39.032229999999984

O Sr Nb Bi

143 16 32 32

Selective dynamics

Direct

0.110860999999999 0.0703140000000033 0.0000100000000032  
0.610860999999999 0.0703140000000033 0.0000100000000032  
0.3611289999999983 0.2480490000000017 0.0000000000000000  
0.8611289999999983 0.2480490000000017 0.0000000000000000  
0.110860999999999 0.5703140000000033 0.0000100000000032  
0.610860999999999 0.5703140000000033 0.0000100000000032  
0.3611289999999983 0.7480490000000017 0.0000000000000000  
0.8611289999999983 0.7480490000000017 0.0000000000000000  
0.7207569999999990 0.3900569999999988 0.0449660000000023  
0.2207569999999990 0.3900569999999988 0.0449660000000023  
0.2207569999999990 0.8900569999999988 0.0449660000000023  
0.7207569999999990 0.8900569999999988 0.0449660000000023  
0.4706990000000033 0.4281849999999991 0.0450099999999978  
0.9706990000000033 0.4281849999999991 0.0450099999999978  
0.4706990000000033 0.9281849999999991 0.0450099999999978  
0.9706990000000033 0.9281849999999991 0.0450099999999978  
0.2502339999999990 0.1460379999999972 0.0575049999999990  
0.75023399999999350 0.1460379999999972 0.0575049999999990  
0.0003069999999994 0.1722370000000026 0.0575270000000003  
0.5003069999999994 0.1722370000000026 0.0575270000000003  
0.2502339999999990 0.6460379999999972 0.0575049999999990  
0.75023399999999350 0.6460379999999972 0.0575049999999990  
0.0003069999999994 0.6722370000000026 0.0575270000000003  
0.5003069999999994 0.6722370000000026 0.0575270000000003  
0.1105939999999990 0.0078310000000030 0.1009559999999965  
0.6105939999999990 0.0078310000000030 0.1009559999999965  
0.3604309999999984 0.3104030000000009 0.1009609999999981  
0.8604309999999984 0.3104030000000009 0.1009609999999981  
0.1105939999999990 0.5078310000000030 0.1009559999999965  
0.6105939999999990 0.5078310000000030 0.1009559999999965  
0.3604309999999984 0.8104030000000009 0.1009609999999981  
0.8604309999999984 0.8104030000000009 0.1009609999999981  
0.2502730000000000 0.1460980000000021 0.1443620000000010  
0.7502730000000000 0.1460980000000021 0.1443620000000010  
0.0002649999999988 0.1722340000000031 0.1443629999999985  
0.5002649999999988 0.1722340000000031 0.1443629999999985  
0.2502730000000000 0.6460980000000021 0.1443620000000010  
0.7502730000000000 0.6460980000000021 0.1443620000000010  
0.0002649999999988 0.6722340000000031 0.1443629999999985  
0.5002649999999988 0.6722340000000031 0.1443629999999985  
0.2207760000000007 0.3901219999999981 0.1569550000000035  
0.7207760000000007 0.3901219999999981 0.1569550000000035  
0.4706139999999976 0.4281819999999996 0.1569470000000024  
0.9706139999999976 0.4281819999999996 0.1569470000000024



0.2207760000000007 0.8901219999999981 0.1569550000000035  
0.7207760000000007 0.8901219999999981 0.1569550000000035  
0.4706139999999976 0.9281819999999996 0.1569470000000024  
0.9706139999999976 0.9281819999999996 0.1569470000000024  
0.1109700000000018 0.0703140000000033 0.2018879999999967  
0.6109700000000018 0.0703140000000033 0.2018879999999967  
0.3609890000000036 0.2479310000000012 0.2018989999999974  
0.8609890000000036 0.2479310000000012 0.2018989999999974  
0.1109700000000018 0.5703140000000033 0.2018879999999967  
0.6109700000000018 0.5703140000000033 0.2018879999999967  
0.3609890000000036 0.7479310000000226 0.2018989999999974  
0.8609890000000036 0.7479310000000226 0.2018989999999974  
0.2690089999999969 0.4027510000000021 0.2607700000000008  
0.7690089999999969 0.4027510000000021 0.2607700000000008  
0.0190380000000019 0.4154449999999983 0.2607700000000008  
0.5190380000000019 0.4154449999999983 0.2607700000000008  
0.2690089999999969 0.9027509999999879 0.2607700000000008  
0.7690089999999969 0.9027509999999879 0.2607700000000008  
0.0190380000000019 0.9154449999999983 0.2607700000000008  
0.5190380000000019 0.9154449999999983 0.2607700000000008  
0.2690040000000025 0.1528160000000014 0.2627069999999989  
0.7690040000000025 0.1528160000000014 0.2627069999999989  
0.0191260000000000 0.1654199999999975 0.2627049999999969  
0.5191260000000000 0.1654199999999975 0.2627049999999969  
0.2690040000000025 0.6528160000000014 0.2627069999999989  
0.7690040000000025 0.6528160000000014 0.2627069999999989  
0.0191260000000000 0.6654199999999975 0.2627049999999969  
0.5191260000000000 0.6654199999999975 0.2627049999999969  
0.3602260433732388 0.0033352568640140 0.3248429575060767  
0.8580775553816142 0.0058751185034816 0.3244053206415961  
0.1137200743815880 0.3244035631648476 0.3262443176695506  
0.6043704268864705 0.3236891806903919 0.3259051370702259  
0.3674725317236202 0.5149228858426446 0.3222988964092896  
0.8596878343431141 0.4992517934861785 0.3247935018463265  
0.1180671758020448 0.8105090274880065 0.3252189722076945  
0.6008644385558818 0.8094299605668491 0.3257280087793999  
0.2408594166022511 0.1618214915192288 0.3740832498561823  
0.7379818090832495 0.1627808987796110 0.3734261156529960  
0.4881382318183441 0.1636353888999784 0.3737201783370004  
0.9909006891665161 0.1654058204547045 0.3732808063025038  
0.2460549653324791 0.6580806436647734 0.3804012782900304  
0.7377963217503390 0.6574936321274092 0.3731700624762216  
0.4862840418362368 0.6592142085845859 0.3817050416771234  
0.9910236392277324 0.6590841463166133 0.3731854999093114

0.9903632388743804 0.4134879467384316 0.3855180558505832  
0.4873125712310467 0.4184779750988707 0.3858814907895381  
0.9931020510684232 0.9128386426619211 0.3812158539333421  
0.4911642763328439 0.9135911972410949 0.3848658418805942  
0.2469768869356846 0.4176520704832059 0.3854280722405353  
0.7411903393278050 0.4095324695035082 0.3855656640624616  
0.2416325642820193 0.9104473981708825 0.3846109804932629  
0.7399448479140623 0.9089294148362322 0.3814970737517845  
0.3625385552951952 0.0615386557913175 0.4306984876208170  
0.8642182841691323 0.0516841673705784 0.4276394469896404  
0.1214495213803450 0.2645781073500380 0.4293701575887932  
0.6057933230482520 0.2608839211614894 0.4290197023313817  
0.8620325327293945 0.5695360382756226 0.4306650581033632  
0.6284735424895382 0.7700251853620829 0.4301036062011691  
0.1004661858006063 0.7692160502990970 0.4291322622253271  
0.2490315829817754 0.4131463847475402 0.4718791576570575  
0.7416225345373415 0.4079168336122160 0.4711136511158325  
-0.0059226047339548 0.4165750255484122 0.4703138337394195  
0.4857502116581419 0.4240170558113192 0.4682512834579027  
0.2436403382041203 0.9085455227849876 0.4707476173140792  
0.7479541308756750 0.9059144971370785 0.4753776871404314  
-0.0044982805785576 0.9158366575094554 0.4749661549616538  
0.4972015742544413 0.9186690298591017 0.4718083957763250  
0.4806273273764968 0.1706849309480393 0.4866874091077589  
0.9864718715409757 0.1696210284832095 0.4821812049816908  
0.4843239657348148 0.6640961370506221 0.4771296002313382  
0.9920998723020823 0.6619730805543612 0.4875830412778695  
0.2350871229211891 0.1565607385100807 0.4884527867846913  
0.7338264469579272 0.1580487992966120 0.4824802439332172  
0.2454664374783728 0.6539140806737596 0.4738595104782886  
0.7348681877335095 0.6537337070519772 0.4893357213941599  
0.1008415374936953 0.3317539457300559 0.5296301258457667  
0.5996123049210581 0.3284096843536621 0.5281785100018974  
0.1318164954842326 0.8193588918522098 0.5296593223384123  
0.5987400270275096 0.8237245909078409 0.5304599135221945  
0.3711645947782603 0.5197892749847506 0.5341155131331389  
0.8623940065874420 0.4851443833768541 0.5298237887249949  
0.3588933872524119 0.9805167902112072 0.5308401918677258  
0.8658163531034401 0.0137268973534926 0.5318322623746664  
-0.0007874838230530 0.1754118247409693 0.5999755791810139  
0.5076153346117901 0.1561267803745165 0.5810865780833501  
0.0212336167595052 0.6776928859409322 0.5909008391267555  
0.5116975248726645 0.6662338788758453 0.6017784541537186  
0.2555697493080121 0.1515599551993107 0.5931187874752105

0.7453212739757589 0.1324509286437152 0.6054421839459336  
0.2559593203499052 0.6405404649117032 0.6032374461979157  
0.7650121189756216 0.6690889942609436 0.5794740573431576  
0.0277589530374154 0.4143180732134963 0.5941431927371673  
0.5157001169754883 0.4065486368108077 0.5916705079899057  
0.0284895549574609 0.9215379913391086 0.5919762897979228  
0.5304493057636185 0.9145797655137070 0.5943911486728074  
0.2715640396596800 0.4042489380319472 0.5930413877176801  
0.7697383308440033 0.3998749113431065 0.5903655266512589  
0.2720710530007168 0.9002419691042254 0.5939838754689230  
0.7899787871513629 0.8975415101810412 0.5941411355447336  
0.381456999999975 0.036017000000011 0.100949999999974  
0.881456999999975 0.036017000000011 0.100949999999974  
0.131453999999980 0.282167000000012 0.100940999999917  
0.631453999999980 0.282167000000012 0.100940999999917  
0.381456999999975 0.536017000000011 0.100949999999974  
0.881456999999975 0.536017000000011 0.100949999999974  
0.131453999999980 0.782167000000012 0.100940999999917  
0.631453999999980 0.782167000000012 0.100940999999917  
0.6239949949872795 0.0333070997573501 0.4267259035839243  
0.1148723015759731 0.0361177894088476 0.4270584117139467  
0.1119871232050944 0.5395757434473339 0.4268069802451352  
0.6246636079258822 0.5411466007697617 0.4272566044110393  
0.3660383012244872 0.2840803868161607 0.4268661334490338  
0.8712073764796973 0.2809096165198356 0.4274814226976637  
0.3694185951822614 0.7918646820764788 0.4276876707850165  
0.8688266618540774 0.7971842064047145 0.4262676472678144  
0.126581000000016 0.033133999999969 0.046723000000001  
0.626581000000016 0.033133999999969 0.046723000000001  
0.376612999999990 0.284961000000027 0.046714000000015  
0.876612999999990 0.284961000000027 0.046714000000015  
0.126581000000016 0.533133999999969 0.046723000000001  
0.626581000000016 0.533133999999969 0.046723000000001  
0.376612999999990 0.784961000000027 0.046714000000015  
0.876612999999990 0.784961000000027 0.046714000000015  
0.626657999999990 0.033268999999971 0.155186999999980  
0.126657999999990 0.033268999999971 0.155186999999980  
0.376595000000018 0.285071999999995 0.155166000000012  
0.876595000000018 0.285071999999995 0.155166000000012  
0.126657999999990 0.533268999999971 0.155186999999980  
0.626657999999990 0.533268999999971 0.155186999999980  
0.376595000000018 0.785071999999971 0.155166000000012  
0.876595000000018 0.785071999999971 0.155166000000012  
0.3658729255403821 0.0345490163809669 0.3714381367732634

0.8668233694762049 0.0366432907728469 0.3716501876242952  
0.1168045591093586 0.2891364495929812 0.3730461383795285  
0.6153151753961815 0.2886251078259792 0.3725612889124817  
0.3679496122048038 0.5341653103623479 0.3686206158249775  
0.8658521969667891 0.5331199656145433 0.3712311862376716  
0.1170950988092651 0.7874656749576074 0.3723686509912555  
0.6160023938009570 0.7874673779107725 0.3727212140638914  
0.3699496901675636 0.0356958264483301 0.4806213526599367  
0.8695496807940338 0.0368099548715166 0.4841339867143751  
0.1196845618782309 0.2883687868634069 0.4820607865731026  
0.6180879565896956 0.2868819023817369 0.4789395313689062  
0.3688137441120462 0.5356736931309505 0.4875600888848589  
0.8720262612991588 0.5373406675371596 0.4798090532538876  
0.1201017906611015 0.7874580197449006 0.4802946022023341  
0.6212005510408177 0.7869537957558786 0.4813380338698265  
0.1580489999999983 0.2694120000000026 0.2292950000000005  
0.6580489999999983 0.2694120000000026 0.2292950000000005  
0.1580489999999983 0.7694120000000026 0.2292950000000005  
0.6580489999999983 0.7694120000000026 0.2292950000000005  
0.4078700000000026 0.0492119999999971 0.2293179999999992  
0.9078700000000026 0.0492119999999971 0.2293179999999992  
0.4078700000000026 0.5492119999999971 0.2293179999999992  
0.9078700000000026 0.5492119999999971 0.2293179999999992  
0.6577989999999971 0.0193160000000034 0.2941629999999975  
0.1577989999999971 0.0193160000000034 0.2941629999999975  
0.4080250000000021 0.2991209999999995 0.2941769999999977  
0.9080250000000021 0.2991209999999995 0.2941769999999977  
0.1577989999999971 0.5193160000000034 0.2941629999999975  
0.6577989999999971 0.5193160000000034 0.2941629999999975  
0.4080250000000021 0.7991209999999971 0.2941769999999977  
0.9080250000000021 0.7991209999999971 0.2941769999999977  
0.1729450210349283 0.0050703637338858 0.5520409783996585  
0.6666519551641281 0.0183230007260868 0.5617880489638017  
0.4193607274666042 0.2989279160483230 0.5513089609032799  
0.9190427124902613 0.3067887964896928 0.5577494103657035  
0.1463403274254699 0.5338671725598519 0.5641656521726405  
0.6815339583122336 0.5166244068726668 0.5516820455369094  
0.4271219503128793 0.8008600644550589 0.5590351536861899  
0.9104689771419555 0.7936354205642123 0.5569634614183802  
0.4035673279101115 0.0538997700892934 0.6177900737590934  
0.8999604200114025 0.0314297837138627 0.6238756661007921  
0.1472298682913383 0.2813887914667763 0.6214325045693050  
0.6208102594075934 0.2807721659352044 0.6275029349588147  
0.4010138077929410 0.5209421567415505 0.6234281841903496

0.8014135076268902 0.4793522573270782 0.6435962899157895  
0.1389865954537614 0.7867258432574555 0.6216207683374606  
0.6770215910355143 0.7294481452321661 0.6248515269547953

**SBNO(001)-NO**

AutoCreatByScript: N O Sr Nb Bi

1.000000000000000

11.1374600000000008 0.0000000000000000 0.0000000000000000  
0.0000000000000000 11.0636399999999995 0.0000000000000000  
0.0000000000000000 0.0000000000000000 39.0322299999999984

N O Sr Nb Bi

1 145 16 32 32

Selective dynamics

Direct

0.3914048220358202 0.5426262241890498 0.6856913327534591  
0.1108609999999999 0.0703140000000033 0.0000100000000032  
0.6108609999999999 0.0703140000000033 0.0000100000000032  
0.3611289999999983 0.2480490000000017 0.0000000000000000  
0.8611289999999983 0.2480490000000017 0.0000000000000000  
0.1108609999999999 0.5703140000000033 0.0000100000000032  
0.6108609999999999 0.5703140000000033 0.0000100000000032  
0.3611289999999983 0.7480490000000017 0.0000000000000000  
0.8611289999999983 0.7480490000000017 0.0000000000000000  
0.2207569999999990 0.3900569999999988 0.0449660000000023  
0.7207569999999990 0.3900569999999988 0.0449660000000023  
0.2207569999999990 0.8900569999999988 0.0449660000000023  
0.7207569999999990 0.8900569999999988 0.0449660000000023  
0.4706900000000033 0.4281849999999991 0.0450099999999978  
0.9706900000000033 0.4281849999999991 0.0450099999999978  
0.4706900000000033 0.9281849999999991 0.0450099999999978  
0.9706900000000033 0.9281849999999991 0.0450099999999978  
0.2502339999999990 0.1460379999999972 0.0575049999999990  
0.7502339999999990 0.1460379999999972 0.0575049999999990  
0.0003069999999994 0.1722370000000026 0.0575270000000003  
0.5003069999999994 0.1722370000000026 0.0575270000000003  
0.2502339999999990 0.6460379999999972 0.0575049999999990  
0.7502339999999990 0.6460379999999972 0.0575049999999990  
0.0003069999999994 0.6722370000000026 0.0575270000000003  
0.5003069999999994 0.6722370000000026 0.0575270000000003  
0.1105939999999990 0.0078310000000030 0.1009559999999965  
0.6105939999999990 0.0078310000000030 0.1009559999999965  
0.3604309999999984 0.3104030000000009 0.1009609999999981  
0.8604309999999984 0.3104030000000009 0.1009609999999981

0.1105939999999990 0.5078310000000030 0.1009559999999965  
0.6105939999999990 0.5078310000000030 0.1009559999999965  
0.3604309999999984 0.8104030000000009 0.1009609999999981  
0.8604309999999984 0.8104030000000009 0.1009609999999981  
0.2502730000000000 0.1460980000000021 0.1443620000000010  
0.7502730000000000 0.1460980000000021 0.1443620000000010  
0.0002649999999988 0.1722340000000031 0.1443629999999985  
0.5002649999999988 0.1722340000000031 0.1443629999999985  
0.2502730000000000 0.6460980000000021 0.1443620000000010  
0.7502730000000000 0.6460980000000021 0.1443620000000010  
0.0002649999999988 0.6722340000000031 0.1443629999999985  
0.5002649999999988 0.6722340000000031 0.1443629999999985  
0.2207760000000007 0.3901219999999981 0.1569550000000035  
0.7207760000000007 0.3901219999999981 0.1569550000000035  
0.4706139999999976 0.4281819999999996 0.1569470000000024  
0.9706139999999976 0.4281819999999996 0.1569470000000024  
0.2207760000000007 0.8901219999999981 0.1569550000000035  
0.7207760000000007 0.8901219999999981 0.1569550000000035  
0.4706139999999976 0.9281819999999996 0.1569470000000024  
0.9706139999999976 0.9281819999999996 0.1569470000000024  
0.1109700000000018 0.0703140000000033 0.2018879999999967  
0.6109700000000018 0.0703140000000033 0.2018879999999967  
0.3609890000000036 0.2479310000000012 0.2018989999999974  
0.8609890000000036 0.2479310000000012 0.2018989999999974  
0.1109700000000018 0.5703140000000033 0.2018879999999967  
0.6109700000000018 0.5703140000000033 0.2018879999999967  
0.3609890000000036 0.7479310000000012 0.2018989999999974  
0.8609890000000036 0.7479310000000012 0.2018989999999974  
0.2690089999999969 0.4027510000000021 0.2607700000000008  
0.7690089999999969 0.4027510000000021 0.2607700000000008  
0.0190380000000019 0.4154449999999983 0.2607700000000008  
0.5190380000000019 0.4154449999999983 0.2607700000000008  
0.2690089999999969 0.9027510000000021 0.2607700000000008  
0.7690089999999969 0.9027510000000021 0.2607700000000008  
0.0190380000000019 0.9154449999999983 0.2607700000000008  
0.5190380000000019 0.9154449999999983 0.2607700000000008  
0.2690040000000025 0.1528160000000014 0.2627069999999989  
0.7690040000000025 0.1528160000000014 0.2627069999999989  
0.0191260000000000 0.1654199999999975 0.2627049999999969  
0.5191260000000000 0.1654199999999975 0.2627049999999969  
0.2690040000000025 0.6528160000000014 0.2627069999999989  
0.7690040000000025 0.6528160000000014 0.2627069999999989  
0.0191260000000000 0.6654199999999975 0.2627049999999969  
0.5191260000000000 0.6654199999999975 0.2627049999999969

0.3616240262947190 0.0025641100553626 0.3247633946790598  
0.8617942595827022 0.0023641334374914 0.3247590770858036  
0.3620523676125057 0.5031347291213394 0.3246695464319054  
0.8622453368838409 0.5034487336663520 0.3245882092586229  
0.1117687880598397 0.3156290834554816 0.3247381731839572  
0.6111540123527458 0.3161224236155993 0.3248121542182153  
0.1120471909261790 0.8149921455682112 0.3246365157621956  
0.6123511032640252 0.8147305457485672 0.3246563122683322  
0.2411457311176319 0.1576178764019009 0.3747265998025346  
0.7410111769390211 0.1574938626851271 0.3745639135274862  
0.4912072888789808 0.1601165170842077 0.3748732954937682  
0.9911533131593436 0.1600890071981025 0.3747606778070748  
0.2411649482944376 0.6575368723829811 0.3748719285762852  
0.7413919439730153 0.6574965398427466 0.3749742819760746  
0.4913595179553197 0.6599567014953805 0.3748701175248386  
0.9914235626665343 0.6601362410156438 0.3750006359869536  
0.2444358775877300 0.4064114392476772 0.3847426347372944  
0.7445776960170548 0.4064793517599258 0.3845353049168593  
0.9939814385475190 0.4115211901019493 0.3846390841311063  
0.4937844569354798 0.4114882058589645 0.3848968434490307  
0.2438441508345651 0.9061656098234721 0.3846407389989540  
0.7439389112390983 0.9062041060586974 0.3848293279326971  
0.9942438843324962 0.9112027444726872 0.3848187579896503  
0.4943177846146558 0.9111145859837243 0.3846306976447603  
0.3620467130652289 0.0587920096170679 0.4310712102071247  
0.8622010548194173 0.0607826549653317 0.4312130245600909  
0.3623834445741342 0.5621261587030030 0.4316435492302189  
0.8631129506582979 0.5603508426025199 0.4317545088949384  
0.6142467191848446 0.2584557802286943 0.4312072967041797  
0.1126857263976580 0.2582782013440502 0.4312048817747818  
0.6124612897179545 0.7560924276685216 0.4316375687920017  
0.1134412865522870 0.7565761934261581 0.4318131143853210  
0.0043432807331705 0.4231158346992526 0.4736309472631149  
0.5040965266260528 0.4234171725976397 0.4731951921254387  
0.0033755785971098 0.9224861447884724 0.4732448109716991  
0.5034325471579800 0.9218707648060638 0.4733284042271066  
0.2537610657072971 0.3956517209389104 0.4734764466791725  
0.7538164749044794 0.3952165237221180 0.4736894927228408  
0.2537645821171596 0.8944881176415121 0.4737643646190185  
0.7540106202338034 0.8948685985857969 0.4731182881360028  
0.4767645939956213 0.1738919351761163 0.4877514213351737  
0.9763961081422291 0.1741065575348223 0.4885643434788759  
0.4772084089176715 0.6741825035090790 0.4902388450873111  
0.9769342808706509 0.6741077533038324 0.4897538365389444

0.2266889856459400 0.1435513853996357 0.4882913596727115  
0.7265601511369717 0.1433649899421347 0.4889516331186348  
0.2272657090461522 0.6440176398071402 0.4900981902504026  
0.7273492891152277 0.6437848435828114 0.4896411162401119  
0.1090011585326013 0.3254490613307248 0.5319299268277552  
0.6075981582742741 0.3269556540252946 0.5318487241621671  
0.1081663021742445 0.8319315965321192 0.5320743814006128  
0.6113237567372943 0.8318026740345840 0.5316957200073421  
0.3606165566761366 0.4880292242462380 0.5318425365040143  
0.8602888970006370 0.4869137345317149 0.5321841318519506  
0.3587545299986346 0.9920941694452123 0.5319322466000509  
0.8590100657174601 0.9900687850940021 0.5320021474691562  
0.2733790916275282 0.1624933480838804 0.5898521546866743  
0.7720572244912842 0.1632079088374109 0.5895977874458176  
0.2728984504311938 0.6640247797038500 0.5857007931352534  
0.7726164843050446 0.6620161701337500 0.5885082000525238  
0.0239896772484137 0.1557725045713214 0.5897286225236906  
0.5231767593499765 0.1552177755545948 0.5899606141802658  
0.0231658527963292 0.6543804762908709 0.5881797630269929  
0.5238653297724440 0.6564058995077163 0.5854629309723050  
0.2607463206395804 0.4153843661048680 0.5924904820701397  
0.7599312130235907 0.4154027088770461 0.5935806569607099  
0.2577261802030941 0.9173103749436423 0.5937758836134928  
0.7580164300998993 0.9151563811319969 0.5936512238610415  
0.0091678705572696 0.4012247879399277 0.5936314604957029  
0.5108332232158866 0.4036535897480846 0.5933373019089657  
0.0090793599453578 0.9003701299734225 0.5940472426393593  
0.5082073841379390 0.9016320715095493 0.5929173751509117  
0.3880395082961487 0.5350238797578335 0.7163507276216997  
0.3814569999999975 0.0360170000000011 0.1009499999999974  
0.8814569999999975 0.0360170000000011 0.1009499999999974  
0.1314539999999980 0.2821670000000012 0.1009409999999988  
0.6314539999999980 0.2821670000000012 0.1009409999999988  
0.3814569999999975 0.5360170000000011 0.1009499999999974  
0.8814569999999975 0.5360170000000011 0.1009499999999974  
0.1314539999999980 0.7821670000000012 0.1009409999999988  
0.6314539999999980 0.7821670000000012 0.1009409999999988  
0.1229835313882957 0.0327431779661188 0.4265163781117873  
0.6222988834947711 0.0327688659318172 0.4264720877609628  
0.3728263978620625 0.2846208090601763 0.4265943411557075  
0.8727027631201095 0.2860031452783037 0.4265361990027046  
0.1226000448064745 0.5317489589976248 0.4263607001148196  
0.6236994127495745 0.5315576679799006 0.4263495859004531  
0.3726907760191570 0.7865620115423460 0.4264059979306469



0.8731330433201684 0.7852850569561466 0.4263396457142063  
0.1265810000000016 0.0331339999999969 0.0467230000000001  
0.6265810000000016 0.0331339999999969 0.0467230000000001  
0.3766129999999990 0.2849610000000027 0.0467140000000015  
0.8766129999999990 0.2849610000000027 0.0467140000000015  
0.1265810000000016 0.5331339999999969 0.0467230000000001  
0.6265810000000016 0.5331339999999969 0.0467230000000001  
0.3766129999999990 0.7849610000000027 0.0467140000000015  
0.8766129999999990 0.7849610000000027 0.0467140000000015  
0.1266579999999990 0.0332689999999971 0.1551869999999980  
0.6266579999999990 0.0332689999999971 0.1551869999999980  
0.3765950000000018 0.2850719999999995 0.1551660000000012  
0.8765950000000018 0.2850719999999995 0.1551660000000012  
0.1266579999999990 0.5332689999999971 0.1551869999999980  
0.6266579999999990 0.5332689999999971 0.1551869999999980  
0.3765950000000018 0.7850719999999995 0.1551660000000012  
0.8765950000000018 0.7850719999999995 0.1551660000000012  
0.3678354075914991 0.0320890908638374 0.3714543211921327  
0.8677482331253389 0.0320563243094191 0.3714056371965852  
0.1178871338365287 0.2856074554832455 0.3713947794272349  
0.6178454825436568 0.2857160277921840 0.3714513053530182  
0.3679262954848704 0.5320447496920960 0.3713090769123013  
0.8680818219382459 0.5320833807271368 0.3712399154622172  
0.1179650143143320 0.7857156431359645 0.3712510799805839  
0.6179622530766636 0.7855089264292130 0.3712863902352024  
0.3702655750462029 0.0342372038379996 0.4809854711044406  
0.8701132837276558 0.0345445680128058 0.4807361240442672  
0.3707584505657039 0.5344861341314131 0.4808675130139615  
0.8705874660945706 0.5342953142001714 0.4813260687915819  
0.1203040194190717 0.2833269682162154 0.4809758366012473  
0.6201383878939446 0.2831290021867349 0.4810562399447779  
0.1202458614210766 0.7831304346924645 0.4811754491896738  
0.6210563752974957 0.7831864171990092 0.4809867885448616  
0.1580489999999983 0.2694120000000026 0.2292950000000005  
0.6580489999999983 0.2694120000000026 0.2292950000000005  
0.1580489999999983 0.7694120000000026 0.2292950000000005  
0.6580489999999983 0.7694120000000026 0.2292950000000005  
0.4078700000000026 0.0492119999999971 0.2293179999999992  
0.9078700000000026 0.0492119999999971 0.2293179999999992  
0.4078700000000026 0.5492119999999971 0.2293179999999992  
0.9078700000000026 0.5492119999999971 0.2293179999999992  
0.1577989999999971 0.0193160000000034 0.2941629999999975  
0.6577989999999971 0.0193160000000034 0.2941629999999975  
0.4080250000000021 0.2991209999999995 0.2941769999999977

0.9080250000000021 0.2991209999999995 0.2941769999999977  
0.1577989999999971 0.5193160000000034 0.2941629999999975  
0.6577989999999971 0.5193160000000034 0.2941629999999975  
0.4080250000000021 0.7991209999999995 0.2941769999999977  
0.9080250000000021 0.7991209999999995 0.2941769999999977  
0.1712741467260574 0.0218972204252148 0.5512868765789092  
0.6704120696528552 0.0215431891536510 0.5514178312503170  
0.1724357562248005 0.5223198637542315 0.5504903099420494  
0.6691988744851058 0.5189665576511768 0.5509784550995419  
0.4184615161521014 0.2994373304013207 0.5522902199083315  
0.9214953709984223 0.2965019611142027 0.5511540579443294  
0.4217468600858485 0.7940885798122420 0.5497732404577560  
0.9201068232142241 0.7990316806190749 0.5511061891044240  
0.3955618372839783 0.0400621310566183 0.6176248536921560  
0.8948885295312542 0.0419082019077685 0.6174290250491330  
0.1466228993234308 0.2788654846045894 0.6176318947052292  
0.6441716596844371 0.2777524692176785 0.6179303468573811  
0.3954669973390826 0.5469227154226304 0.6192700250332888  
0.8953218778714634 0.5423496859309885 0.6168416266874348  
0.1480559230492502 0.7725196232596733 0.6165349435988501  
0.6414317323159889 0.7730459479596965 0.6164498565756501

## SBNO(001)-2NO

AutoCreatByScript: N O Sr Nb Bi

1.0000000000000000

11.1374600000000008 0.0000000000000000 0.0000000000000000

0.0000000000000000 11.0636399999999995 0.0000000000000000

0.0000000000000000 0.0000000000000000 39.0322299999999984

N O Sr Nb Bi

2 146 16 32 32

Selective dynamics

Direct

0.6490788981270054 0.2774525443468862 0.6894135272414283

0.3897992833630515 0.5386982869242135 0.6881210257172432

0.1108609999999999 0.0703140000000033 0.0000100000000032

0.6108609999999999 0.0703140000000033 0.0000100000000032

0.3611289999999983 0.2480490000000017 0.0000000000000000

0.8611289999999983 0.2480490000000017 0.0000000000000000

0.1108609999999999 0.5703140000000033 0.0000100000000032

0.6108609999999999 0.5703140000000033 0.0000100000000032

0.3611289999999983 0.7480490000000017 0.0000000000000000

0.8611289999999983 0.7480490000000017 0.0000000000000000

0.7207569999999990 0.3900569999999988 0.0449660000000023

0.2207569999999990 0.3900569999999988 0.0449660000000023  
0.2207569999999990 0.8900569999999988 0.0449660000000023  
0.7207569999999990 0.8900569999999988 0.0449660000000023  
0.4706990000000033 0.4281849999999991 0.0450099999999978  
0.9706990000000033 0.4281849999999991 0.0450099999999978  
0.4706990000000033 0.9281849999999991 0.0450099999999978  
0.9706990000000033 0.9281849999999991 0.0450099999999978  
0.2502339999999990 0.1460379999999972 0.0575049999999990  
0.7502339999999990 0.1460379999999972 0.0575049999999990  
0.0003069999999994 0.1722370000000026 0.0575270000000003  
0.5003069999999994 0.1722370000000026 0.0575270000000003  
0.2502339999999990 0.6460379999999972 0.0575049999999990  
0.7502339999999990 0.6460379999999972 0.0575049999999990  
0.0003069999999994 0.6722370000000026 0.0575270000000003  
0.5003069999999994 0.6722370000000026 0.0575270000000003  
0.1105939999999990 0.0078310000000030 0.1009559999999965  
0.6105939999999990 0.0078310000000030 0.1009559999999965  
0.3604309999999984 0.3104030000000009 0.1009609999999981  
0.8604309999999984 0.3104030000000009 0.1009609999999981  
0.1105939999999990 0.5078310000000030 0.1009559999999965  
0.6105939999999990 0.5078310000000030 0.1009559999999965  
0.3604309999999984 0.8104030000000009 0.1009609999999981  
0.8604309999999984 0.8104030000000009 0.1009609999999981  
0.2502730000000000 0.1460980000000021 0.1443620000000010  
0.7502730000000000 0.1460980000000021 0.1443620000000010  
0.0002649999999988 0.1722340000000031 0.1443629999999985  
0.5002649999999988 0.1722340000000031 0.1443629999999985  
0.2502730000000000 0.6460980000000021 0.1443620000000010  
0.7502730000000000 0.6460980000000021 0.1443620000000010  
0.0002649999999988 0.6722340000000031 0.1443629999999985  
0.5002649999999988 0.6722340000000031 0.1443629999999985  
0.2207760000000007 0.3901219999999981 0.1569550000000035  
0.7207760000000007 0.3901219999999981 0.1569550000000035  
0.4706139999999976 0.4281819999999996 0.1569470000000024  
0.9706139999999976 0.4281819999999996 0.1569470000000024  
0.2207760000000007 0.8901219999999981 0.1569550000000035  
0.7207760000000007 0.8901219999999981 0.1569550000000035  
0.4706139999999976 0.9281819999999996 0.1569470000000024  
0.9706139999999976 0.9281819999999996 0.1569470000000024  
0.1109700000000018 0.0703140000000033 0.2018879999999967  
0.6109700000000018 0.0703140000000033 0.2018879999999967  
0.3609890000000036 0.2479310000000012 0.2018989999999974  
0.8609890000000036 0.2479310000000012 0.2018989999999974  
0.1109700000000018 0.5703140000000033 0.2018879999999967

0.610970000000018 0.570314000000033 0.201887999999967  
0.360989000000036 0.747931000000012 0.201898999999974  
0.860989000000036 0.747931000000012 0.201898999999974  
0.269008999999969 0.402751000000021 0.260770000000008  
0.769008999999969 0.402751000000021 0.260770000000008  
0.019038000000019 0.415444999999983 0.260770000000008  
0.519038000000019 0.415444999999983 0.260770000000008  
0.269008999999969 0.902751000000021 0.260770000000008  
0.769008999999969 0.902751000000021 0.260770000000008  
0.019038000000019 0.915444999999983 0.260770000000008  
0.519038000000019 0.915444999999983 0.260770000000008  
0.269004000000025 0.152816000000014 0.262706999999989  
0.769004000000025 0.152816000000014 0.262706999999989  
0.019126000000000 0.165419999999975 0.262704999999969  
0.519126000000000 0.165419999999975 0.262704999999969  
0.269004000000025 0.652816000000014 0.262706999999989  
0.769004000000025 0.652816000000014 0.262706999999989  
0.019126000000000 0.665419999999975 0.262704999999969  
0.519126000000000 0.665419999999975 0.262704999999969  
0.8606867457934612 0.5035511717341301 0.3248464903101325  
0.3609867483833719 0.5030704895985219 0.3248520329750316  
0.6106643822259444 0.8151475691322257 0.3248721896079323  
0.1103892335512897 0.8152017321637836 0.3248446414323444  
0.8609547913652650 0.0028475467402263 0.3248758801294178  
0.3605753840028454 0.0029639552380759 0.3248572681540789  
0.1105102948979378 0.3151886866812194 0.3248872055556358  
0.6099441231881997 0.3154478833128183 0.3249285012364644  
0.7392028101333570 0.1571919706708264 0.3748763740160929  
0.2392374066665460 0.1572740883429430 0.3750127896326856  
0.9893544428816474 0.1604779250600132 0.3750751889177302  
0.4890983188902852 0.1605838219570286 0.3750322146835320  
0.2391821109582297 0.6573686602913138 0.3749360162820045  
0.4893224990686503 0.6606161681263362 0.3750320504124612  
0.7392559036405958 0.6574079324289884 0.3751879833777535  
0.9893782439923291 0.6607453847423506 0.3751234093041755  
0.7431204169887595 0.4059832598378067 0.3847205508689854  
0.9929652158195303 0.4120378228132810 0.3846278576152796  
0.2427509385032987 0.9058873500198943 0.3847862836730258  
0.4929226970091191 0.9119923369251645 0.3847032330919548  
0.2431697541342724 0.4060586135062252 0.3847737008756700  
0.4928586091148682 0.4121410349995211 0.3849777541138894  
0.7429992342584664 0.9059226808430203 0.3848230537738918  
0.9929958101180171 0.9119195130018579 0.3849339705303201  
0.3593589521256221 0.0589415840521735 0.4315941159342171

0.8593269022712056 0.0601014734115762 0.4316620991198141  
0.1100142892435056 0.2587334120974591 0.4315852008925078  
0.6103955087819862 0.2575313218605713 0.4314388538983127  
0.3592542443967544 0.5610343061095935 0.4317490767706741  
0.6090793697446403 0.7584611893400068 0.4316997708845569  
0.8607301220523993 0.5595835476006141 0.4317176631717213  
0.1100616340120290 0.7574166400433325 0.4319301206130242  
0.5037523485253579 0.4256306330916124 0.4734317277423932  
0.7532597278153629 0.8925854502803564 0.4736655934178856  
0.0031722293647465 0.9251414271519148 0.4735903114308770  
0.5028551617336385 0.9252696955761008 0.4739034478150507  
0.2534501386084389 0.3927816911670515 0.4738006971426826  
0.7533684573764424 0.3921551396160793 0.4735732826377120  
0.0037576378179513 0.4255806188336246 0.4736631375379097  
0.2531707286301008 0.8920764813755004 0.4740301182158856  
0.4703922465896643 0.1777169975235532 0.4881116430056518  
0.2199795944688830 0.1399383033161956 0.4883503736055889  
0.9703149309433599 0.1776509142147973 0.4883876037546431  
0.7202058559100710 0.1395390356376719 0.4890009557743402  
0.7207700863901908 0.6401048224407374 0.4883056694443583  
0.9705260332023210 0.6776949739510763 0.4892317853468614  
0.2204759855403300 0.6401725136491748 0.4892409457221186  
0.4705996938803844 0.6778355215260505 0.4891740992865757  
0.6082162083108432 0.8281329939689849 0.5316861708034518  
0.6073327476135860 0.3263435932038381 0.5314010357578335  
0.3587267644517250 0.4904811663367693 0.5316118300385037  
0.1071066799859891 0.3265738566542717 0.5318245618391451  
0.3565149170078826 0.9920568830073779 0.5319266431570245  
0.1067164061538494 0.8293038619712305 0.5320464045919144  
0.8586974226840485 0.9896632684075384 0.5318570750666576  
0.8582268568603936 0.4882877624574350 0.5316445805357114  
0.5213449207132637 0.6596838113265185 0.5875783746820760  
0.2720275897152228 0.6582761576167157 0.5888542519633232  
0.0197320564744304 0.6583169808159614 0.5905105934787260  
0.7699406313427253 0.6567703896617124 0.5905954655701460  
0.7696800568874512 0.1577782935083231 0.5895343150529325  
0.0210445620027235 0.1598676300508341 0.5912564792192048  
0.2706875619905360 0.1586853537445221 0.5908917192344854  
0.5213425582091207 0.1593298186077015 0.5891515175916578  
0.2674493024536284 0.4105060634151242 0.5926479146039425  
0.5150012816805621 0.9065085892141969 0.5928997355804313  
0.5187342175428309 0.4087625943778287 0.5919447193715009  
0.7677159710471588 0.4081711689140133 0.5927143124269384  
0.0166104701777511 0.4068005282818271 0.5935725120774129

0.7649529781599957 0.9098601947100819 0.5932514144679683  
0.2657589394110403 0.9120342858839691 0.5935500542732792  
0.0152363286790163 0.9066262363998299 0.5936125945263274  
0.6479731001457170 0.2778917347194100 0.7199834160402363  
0.3879007605769691 0.5322219036181981 0.7186389793346467  
0.3814569999999975 0.0360170000000011 0.1009499999999974  
0.8814569999999975 0.0360170000000011 0.1009499999999974  
0.1314539999999980 0.2821670000000012 0.1009409999999988  
0.6314539999999980 0.2821670000000012 0.1009409999999988  
0.3814569999999975 0.5360170000000011 0.1009499999999974  
0.8814569999999975 0.5360170000000011 0.1009499999999974  
0.1314539999999980 0.7821670000000012 0.1009409999999988  
0.6314539999999980 0.7821670000000012 0.1009409999999988  
0.6235215459721054 0.5331115082330545 0.4264686704478238  
0.1223341263952904 0.5322463782409208 0.4264474235591289  
0.8725640297696331 0.7847752075470686 0.4265078568193448  
0.6223240279059503 0.0321732428412895 0.4265559095976902  
0.3726753187854007 0.7859593371161423 0.4265463007463652  
0.1227763415632582 0.0333436811693441 0.4265600972683999  
0.3722639606628541 0.2845683132381294 0.4265308119991296  
0.8731817519045870 0.2854966827820261 0.4264564382654017  
0.1265810000000016 0.0331339999999969 0.0467230000000001  
0.6265810000000016 0.0331339999999969 0.0467230000000001  
0.3766129999999990 0.2849610000000027 0.0467140000000015  
0.8766129999999990 0.2849610000000027 0.0467140000000015  
0.1265810000000016 0.5331339999999969 0.0467230000000001  
0.6265810000000016 0.5331339999999969 0.0467230000000001  
0.3766129999999990 0.7849610000000027 0.0467140000000015  
0.8766129999999990 0.7849610000000027 0.0467140000000015  
0.6266579999999990 0.0332689999999971 0.1551869999999980  
0.1266579999999990 0.0332689999999971 0.1551869999999980  
0.3765950000000018 0.2850719999999995 0.1551660000000012  
0.8765950000000018 0.2850719999999995 0.1551660000000012  
0.1266579999999990 0.5332689999999971 0.1551869999999980  
0.6266579999999990 0.5332689999999971 0.1551869999999980  
0.3765950000000018 0.7850719999999995 0.1551660000000012  
0.8765950000000018 0.7850719999999995 0.1551660000000012  
0.8665616799798540 0.5322248534602346 0.3715564437167320  
0.6164147143837101 0.7858373307176434 0.3715341263096173  
0.1164352663755436 0.7858941949133427 0.3714774101769802  
0.1165378961717326 0.2857918882160195 0.3715715977795776  
0.3665280013445897 0.5321956625930687 0.3715199474248287  
0.3663954049525371 0.0321484281169058 0.3715345915354831  
0.8664313632436945 0.0321205508571416 0.3715444026443186

0.6163710772951393 0.2857979788376886 0.3716179267758283  
0.8714619177535124 0.0350158320153972 0.4812831074844826  
0.3716521572130104 0.5348792440367484 0.4812619647268742  
0.3709941681548818 0.0352134638168574 0.4814811822017396  
0.1210698432381275 0.2830805105128671 0.4815636256102231  
0.6216188645870693 0.7826115116573938 0.4814837151069070  
0.6214595744559180 0.2823528759211824 0.4811527506624049  
0.1211732846757688 0.7822377016329154 0.4814443325269303  
0.8714190038211816 0.5348552156389743 0.4816690607965488  
0.1580489999999983 0.2694120000000026 0.2292950000000005  
0.6580489999999983 0.2694120000000026 0.2292950000000005  
0.1580489999999983 0.7694120000000026 0.2292950000000005  
0.6580489999999983 0.7694120000000026 0.2292950000000005  
0.4078700000000026 0.0492119999999971 0.2293179999999992  
0.9078700000000026 0.0492119999999971 0.2293179999999992  
0.4078700000000026 0.5492119999999971 0.2293179999999992  
0.9078700000000026 0.5492119999999971 0.2293179999999992  
0.6577989999999971 0.0193160000000034 0.2941629999999975  
0.1577989999999971 0.0193160000000034 0.2941629999999975  
0.4080250000000021 0.2991209999999995 0.2941769999999977  
0.9080250000000021 0.2991209999999995 0.2941769999999977  
0.1577989999999971 0.5193160000000034 0.2941629999999975  
0.6577989999999971 0.5193160000000034 0.2941629999999975  
0.4080250000000021 0.7991209999999995 0.2941769999999977  
0.9080250000000021 0.7991209999999995 0.2941769999999977  
0.4204387295410541 0.7964663963851555 0.5518167039655135  
0.1723591554300357 0.5200557725321994 0.5524833660310227  
0.6665713589310166 0.5154700551898466 0.5531294556630493  
0.9187028242614298 0.2991491249653258 0.5530391813710892  
0.9195330221786405 0.7995144650619658 0.5528736661352783  
0.1695952496921521 0.0188215447903361 0.5529783619056974  
0.6703080925443534 0.0215890822325249 0.5526012138169627  
0.4198137414862038 0.2986132411310782 0.5530444785391662  
0.6433996441325711 0.7741225924124034 0.6177295694785696  
0.1488882781568900 0.7739393246978097 0.6178666001268219  
0.8949571353068378 0.5393299515959291 0.6184669439615593  
0.8942099895205156 0.0425017625677008 0.6183588831194157  
0.3994258223151514 0.0428379099918798 0.6181924445163252  
0.1482982463728603 0.2788423863165092 0.6186378250962273  
0.6454830847825869 0.2756400544826791 0.6211352144281708  
0.4000790936649594 0.5422743217931841 0.6202844038844570

**SBNO(001)-UT-NO**

AutoCreatByScript: N O Sr Nb Bi

1.0000000000000000

11.1374600000000008 0.0000000000000000 0.0000000000000000  
0.0000000000000000 11.0636399999999995 0.0000000000000000  
0.0000000000000000 0.0000000000000000 39.0322299999999984

N O Sr Nb Bi

1 144 16 32 32

Selective dynamics

Direct

0.6609802140668215 0.5311791462844048 0.6546529209700986  
0.1108609999999999 0.0703140000000033 0.0000100000000032  
0.6108609999999999 0.0703140000000033 0.0000100000000032  
0.3611289999999983 0.2480490000000017 0.0000000000000000  
0.8611289999999983 0.2480490000000017 0.0000000000000000  
0.1108609999999999 0.5703140000000033 0.0000100000000032  
0.6108609999999999 0.5703140000000033 0.0000100000000032  
0.3611289999999983 0.7480490000000017 0.0000000000000000  
0.8611289999999983 0.7480490000000017 0.0000000000000000  
0.7207569999999990 0.3900569999999988 0.0449660000000023  
0.2207569999999990 0.3900569999999988 0.0449660000000023  
0.2207569999999990 0.8900569999999988 0.0449660000000023  
0.7207569999999990 0.8900569999999988 0.0449660000000023  
0.4706990000000033 0.4281849999999991 0.0450099999999978  
0.9706990000000033 0.4281849999999991 0.0450099999999978  
0.4706990000000033 0.9281849999999991 0.0450099999999978  
0.9706990000000033 0.9281849999999991 0.0450099999999978  
0.2502339999999990 0.1460379999999972 0.0575049999999990  
0.7502339999999990 0.1460379999999972 0.0575049999999990  
0.0003069999999994 0.1722370000000026 0.0575270000000003  
0.5003069999999994 0.1722370000000026 0.0575270000000003  
0.2502339999999990 0.6460379999999972 0.0575049999999990  
0.7502339999999990 0.6460379999999972 0.0575049999999990  
0.0003069999999994 0.6722370000000026 0.0575270000000003  
0.5003069999999994 0.6722370000000026 0.0575270000000003  
0.1105939999999990 0.0078310000000030 0.1009559999999965  
0.6105939999999990 0.0078310000000030 0.1009559999999965  
0.3604309999999984 0.3104030000000009 0.1009609999999981  
0.8604309999999984 0.3104030000000009 0.1009609999999981  
0.1105939999999990 0.5078310000000030 0.1009559999999965  
0.6105939999999990 0.5078310000000030 0.1009559999999965  
0.3604309999999984 0.8104030000000009 0.1009609999999981  
0.8604309999999984 0.8104030000000009 0.1009609999999981  
0.2502730000000000 0.1460980000000021 0.1443620000000010  
0.7502730000000000 0.1460980000000021 0.1443620000000010



0.000264999999988 0.172234000000031 0.144362999999985  
0.500264999999988 0.172234000000031 0.144362999999985  
0.250273000000000 0.646098000000021 0.144362000000010  
0.750273000000000 0.646098000000021 0.144362000000010  
0.000264999999988 0.672234000000031 0.144362999999985  
0.500264999999988 0.672234000000031 0.144362999999985  
0.220776000000007 0.390121999999981 0.156955000000035  
0.720776000000007 0.390121999999981 0.156955000000035  
0.470613999999976 0.428181999999996 0.156947000000024  
0.970613999999976 0.428181999999996 0.156947000000024  
0.220776000000007 0.890121999999981 0.156955000000035  
0.720776000000007 0.890121999999981 0.156955000000035  
0.470613999999976 0.928181999999996 0.156947000000024  
0.970613999999976 0.928181999999996 0.156947000000024  
0.110970000000018 0.070314000000033 0.201887999999967  
0.610970000000018 0.070314000000033 0.201887999999967  
0.360989000000036 0.247931000000012 0.201898999999974  
0.860989000000036 0.247931000000012 0.201898999999974  
0.110970000000018 0.570314000000033 0.201887999999967  
0.610970000000018 0.570314000000033 0.201887999999967  
0.360989000000036 0.747931000000012 0.201898999999974  
0.860989000000036 0.747931000000012 0.201898999999974  
0.269008999999969 0.402751000000021 0.260770000000008  
0.769008999999969 0.402751000000021 0.260770000000008  
0.019038000000019 0.415444999999983 0.260770000000008  
0.519038000000019 0.415444999999983 0.260770000000008  
0.269008999999969 0.902751000000021 0.260770000000008  
0.769008999999969 0.902751000000021 0.260770000000008  
0.019038000000019 0.915444999999983 0.260770000000008  
0.519038000000019 0.915444999999983 0.260770000000008  
0.269004000000025 0.152816000000014 0.262706999999989  
0.769004000000025 0.152816000000014 0.262706999999989  
0.019126000000000 0.165419999999975 0.262704999999969  
0.519126000000000 0.165419999999975 0.262704999999969  
0.269004000000025 0.652816000000014 0.262706999999989  
0.769004000000025 0.652816000000014 0.262706999999989  
0.019126000000000 0.665419999999975 0.262704999999969  
0.519126000000000 0.665419999999975 0.262704999999969  
0.3589804319374420 0.5028256611377417 0.3251322136713339  
0.8586196761767002 0.5011746953341314 0.3252498049567435  
0.1078286738025350 0.8146892427704658 0.3251667013882291  
0.6065679371873537 0.8152711617512425 0.3250604868253452  
0.1055588211574992 0.3213905517714440 0.3257300759535419  
0.8535082220373339 -0.0034250006051626 0.3259900443374609

0.3529966501520994 -0.0037404256214371 0.3261461918984790  
0.6049429216143175 0.3217354939287904 0.3258322648110003  
0.9782724406799004 0.1658282614663056 0.3724744460533860  
0.7288247747576990 0.1532772236565279 0.3733290752670274  
0.2281974709868869 0.1534846733017790 0.3733450804385146  
0.4784049851619990 0.1654528237171685 0.3720985583249593  
0.7286188677057669 0.6523302295626014 0.3737484026437559  
0.9796187419255602 0.6645378459546655 0.3749621487382203  
0.4794101478833443 0.6642967250616618 0.3753533527489865  
0.2295690297726389 0.6519725251573187 0.3746475118730793  
0.9909797077898900 0.9132423073336265 0.3840598723966570  
0.7395962818378037 0.4047900801522678 0.3848894152246502  
0.2397988515480627 0.4045821356536854 0.3849650801700172  
0.9882339303771698 0.4154803834179326 0.3854448729664750  
0.2384272657652055 0.9012228543977002 0.3847898504446750  
0.4905007657691319 0.9127737091998941 0.3843017404261644  
0.7380252573665940 0.9012578439144477 0.3847604198949764  
0.4875310684751261 0.4151725371117378 0.3852530144781963  
0.8564169397582129 0.0535771308399372 0.4288942803925367  
0.1027335932032693 0.2571344172965070 0.4293947730159722  
0.6019725966631623 0.2576081679924570 0.4288662557081362  
0.3567275436006924 0.0547978311698728 0.4288384726538743  
0.8511627826586483 0.5655785525569434 0.4309521369065108  
0.1064212824956627 0.7594205286967900 0.4325397186285757  
0.6048602318431282 0.7588562709310239 0.4328110949283973  
0.3544937351782032 0.5625755486210030 0.4322222503884610  
0.9925298264600402 0.4237351693878619 0.4710693318729375  
-0.0045083935645454 0.9228121633730468 0.4741537328477448  
0.7421367990410772 0.3943843413224805 0.4708858929356285  
0.2458263119510202 0.8945325623878206 0.4745554365850649  
0.7460691526812542 0.8936493842149857 0.4746217931241578  
0.4946753901928182 0.9229133547037985 0.4750292040554673  
0.2419679592969778 0.3943804344052638 0.4726830081809928  
0.4937497358561505 0.4229501622029047 0.4735161466530521  
0.9586159206490913 0.1817283277160091 0.4846236148974385  
0.2103525222860633 0.1384619806680052 0.4840086752885247  
0.7113748072117365 0.1363563829928840 0.4837281479994699  
0.4610316106842341 0.1807234721507542 0.4849128773620446  
0.9622925861985249 0.6780946492174664 0.4875974043084101  
0.7102659621567008 0.6353949288489181 0.4886445330342369  
0.2108443286449002 0.6356294655087095 0.4886109456886311  
0.4628733106754133 0.6778629652836003 0.4886496248218540  
0.3485842960980425 0.0097730713655804 0.5315631281655041  
0.0937274163040241 0.3237235799407011 0.5292468192193238

0.8555858453269410 0.0040839064786037 0.5310506639880372  
0.6129900179368902 0.3195136658514784 0.5297371969559338  
0.8517960305568194 0.4829536819621621 0.5294010896081015  
0.6117580221709938 0.8241756643071517 0.5332289652789723  
0.1085391175497752 0.8248848328601036 0.5328147296114651  
0.3528596030379602 0.4849187852099683 0.5315018732940132  
0.5109855759084523 0.9460160404739283 0.5894422906599421  
0.2507685899969935 0.3719692291018205 0.5860344223570916  
0.5263383845284846 0.4234629058996877 0.5894218568576731  
0.7675609777665806 0.3987606823016968 0.5908693879274424  
0.7699616112272165 0.9087228405028754 0.5928401587025854  
0.2771179008721639 0.8884553929874516 0.5939105500066971  
0.0123527741104039 0.4252349324833472 0.5909583740404313  
0.0104768846752859 0.9308965630659163 0.5937632204292628  
0.7716708972751587 0.6434786360977371 0.5873489084180581  
0.9831770673637141 0.1887320624771043 0.6007506059293799  
-0.0044238893005847 0.6876532045579891 0.6058630914254524  
0.2537049815584284 0.6308673485289112 0.5961161497825013  
0.2246408704851041 0.1169566048842260 0.6084076273815204  
0.7308985574098211 0.1467799876494285 0.5998098189386341  
0.4703010569244316 0.1973507541633624 0.6073689576371589  
0.6701007210518760 0.5227710599541866 0.6863323970620302  
0.3814569999999975 0.0360170000000011 0.1009499999999974  
0.8814569999999975 0.0360170000000011 0.1009499999999974  
0.1314539999999980 0.2821670000000012 0.1009409999999988  
0.6314539999999980 0.2821670000000012 0.1009409999999988  
0.3814569999999975 0.5360170000000011 0.1009499999999974  
0.8814569999999975 0.5360170000000011 0.1009499999999974  
0.1314539999999980 0.7821670000000012 0.1009409999999988  
0.6314539999999980 0.7821670000000012 0.1009409999999988  
0.1220845266091237 0.0296544890429605 0.4279555880544664  
0.8687793784271517 0.2802266975547087 0.4268716171581233  
0.1212455931798967 0.5357121614993015 0.4271794572459544  
0.8726556279683493 0.7898504878958612 0.4279725119675499  
0.6193209771145322 0.0303792329124479 0.4280743842549734  
0.3711745128926766 0.7890931076347183 0.4282127612181956  
0.3697294265503577 0.2809000507918328 0.4275762151414436  
0.6188970956965689 0.5341532324227031 0.4273275543312388  
0.1265810000000016 0.0331339999999969 0.0467230000000001  
0.6265810000000016 0.0331339999999969 0.0467230000000001  
0.3766129999999990 0.2849610000000027 0.0467140000000015  
0.8766129999999990 0.2849610000000027 0.0467140000000015  
0.1265810000000016 0.5331339999999969 0.0467230000000001  
0.6265810000000016 0.5331339999999969 0.0467230000000001

0.3766129999999990 0.7849610000000027 0.0467140000000015  
0.8766129999999990 0.7849610000000027 0.0467140000000015  
0.6266579999999990 0.0332689999999971 0.1551869999999980  
0.1266579999999990 0.0332689999999971 0.1551869999999980  
0.3765950000000018 0.2850719999999995 0.1551660000000012  
0.8765950000000018 0.2850719999999995 0.1551660000000012  
0.1266579999999990 0.5332689999999971 0.1551869999999980  
0.6266579999999990 0.5332689999999971 0.1551869999999980  
0.3765950000000018 0.7850719999999995 0.1551660000000012  
0.8765950000000018 0.7850719999999995 0.1551660000000012  
0.3633550866071917 0.5318625707588139 0.3717198773103532  
0.6132145633698309 0.7857303517227240 0.3716392561928776  
0.1136807254811863 0.7856834889749522 0.3718232843037341  
0.8629273586242063 0.5321959911152283 0.3718939089493050  
0.1127194749762715 0.2859004293799169 0.3723554799465634  
0.3632992605706886 0.0325780751675003 0.3731187308217440  
0.8632313924187571 0.0321917998460563 0.3728827274974173  
0.6128248838150068 0.2854885855757088 0.3725674990847092  
0.8705574286298506 0.0344027989574861 0.4833305236184458  
0.1180949639965223 0.2810038678011906 0.4805079213274739  
0.8699832953399467 0.5366823477440900 0.4803269753372109  
0.6200039994385422 0.2806966839109059 0.4811912121646208  
0.6206015301455493 0.7820053093542818 0.4835528838168622  
0.3691805805220620 0.0347336563870394 0.4845079392852326  
0.1208359835242079 0.7818817966220071 0.4840460706452387  
0.3703292952299699 0.5369518529386350 0.4817232576277108  
0.1580489999999983 0.2694120000000026 0.2292950000000005  
0.6580489999999983 0.2694120000000026 0.2292950000000005  
0.1580489999999983 0.7694120000000026 0.2292950000000005  
0.6580489999999983 0.7694120000000026 0.2292950000000005  
0.4078700000000026 0.0492119999999971 0.2293179999999992  
0.9078700000000026 0.0492119999999971 0.2293179999999992  
0.4078700000000026 0.5492119999999971 0.2293179999999992  
0.9078700000000026 0.5492119999999971 0.2293179999999992  
0.6577989999999971 0.0193160000000034 0.2941629999999975  
0.1577989999999971 0.0193160000000034 0.2941629999999975  
0.4080250000000021 0.2991209999999995 0.2941769999999977  
0.9080250000000021 0.2991209999999995 0.2941769999999977  
0.1577989999999971 0.5193160000000034 0.2941629999999975  
0.6577989999999971 0.5193160000000034 0.2941629999999975  
0.4080250000000021 0.7991209999999995 0.2941769999999977  
0.9080250000000021 0.7991209999999995 0.2941769999999977  
0.6683889784258215 0.5190814005543629 0.5524705863375724  
0.9092515816188196 0.3019065989201567 0.5548109484549466

0.6619234253915950 0.0163428801467408 0.5567295810882630  
0.1609052912972501 0.0025878362679276 0.5592475514012987  
0.1661279668737544 0.5108477398925332 0.5542033707928392  
0.9025958298039195 0.7961877518599804 0.5634481728402336  
0.4317102179779977 0.7839364440822394 0.5652900116776488  
0.4177078469607582 0.3062041619542310 0.5569702256310699  
0.8748722083908889 0.5384448516701904 0.6221421020748571  
0.1354260815821091 0.2854043321016970 0.6225397515510213  
0.1583100021553396 0.7619503218837839 0.6294093503164642  
0.8770294715124659 0.0387648487195475 0.6223108447650648  
0.3915001455661571 0.0302544518237114 0.6255342131492254  
0.5333957612810208 0.7070024602531487 0.6376355997771412  
0.6284957677487341 0.3064246833254234 0.6235167827067635  
0.3171508200848536 0.5464626666086029 0.6463960910500630

### SBNO(001)-UT-2NO

AutoCreatByScript: N O Sr Nb Bi

1.0000000000000000  
11.1374600000000008 0.0000000000000000 0.0000000000000000  
0.0000000000000000 11.0636399999999995 0.0000000000000000  
0.0000000000000000 0.0000000000000000 39.0322299999999984

N O Sr Nb Bi  
2 145 16 32 32

Selective dynamics

Direct

0.3378181008960946 0.3139454777755864 0.6574040965938729  
0.6177873024538072 0.5409166511976304 0.6550286036929147  
0.0704568144860005 0.0838719248779967 0.0000100000000032  
0.5704568144860005 0.0838719248779967 0.0000100000000032  
0.3207248144859989 0.2616069248780022 0.0000000000000000  
0.8207248144859989 0.2616069248780022 0.0000000000000000  
0.0704568144860005 0.5838719248779967 0.0000100000000032  
0.5704568144860005 0.5838719248779967 0.0000100000000032  
0.3207248144859989 0.7616069248780022 0.0000000000000000  
0.8207248144859989 0.7616069248780022 0.0000000000000000  
0.1803528144859996 0.4036149248779992 0.0449660000000023  
0.6803528144859996 0.4036149248779992 0.0449660000000023  
0.1803528144859996 0.9036149248779992 0.0449660000000023  
0.6803528144859996 0.9036149248779992 0.0449660000000023  
0.4302948144859968 0.4417429248779996 0.0450099999999978  
0.9302948144859968 0.4417429248779996 0.0450099999999978  
0.4302948144859968 0.9417429248779996 0.0450099999999978  
0.9302948144859968 0.9417429248779996 0.0450099999999978

0.2098298144859996 0.1595959248779977 0.0575049999999990  
0.7098298144859996 0.1595959248779977 0.0575049999999990  
0.9599028144860000 0.1857949248780031 0.0575270000000003  
0.4599028144860000 0.1857949248780031 0.0575270000000003  
0.2098298144859996 0.6595959248779977 0.0575049999999990  
0.7098298144859996 0.6595959248779977 0.0575049999999990  
0.9599028144860000 0.6857949248780031 0.0575270000000003  
0.4599028144860000 0.6857949248780031 0.0575270000000003  
0.0701898144859996 0.0213889248780035 0.1009559999999965  
0.5701898144859996 0.0213889248780035 0.1009559999999965  
0.3200268144859990 0.3239609248780013 0.1009609999999981  
0.8200268144859990 0.3239609248780013 0.1009609999999981  
0.0701898144859996 0.5213889248780035 0.1009559999999965  
0.5701898144859996 0.5213889248780035 0.1009559999999965  
0.3200268144859990 0.8239609248780013 0.1009609999999981  
0.8200268144859990 0.8239609248780013 0.1009609999999981  
0.2098688144860006 0.1596559248780025 0.1443620000000010  
0.7098688144860006 0.1596559248780025 0.1443620000000010  
0.9598608144859995 0.1857919248780036 0.1443629999999985  
0.4598608144859995 0.1857919248780036 0.1443629999999985  
0.2098688144860006 0.6596559248780025 0.1443620000000010  
0.7098688144860006 0.6596559248780025 0.1443620000000010  
0.9598608144859995 0.6857919248780036 0.1443629999999985  
0.4598608144859995 0.6857919248780036 0.1443629999999985  
0.1803718144860014 0.4036799248779985 0.1569550000000035  
0.6803718144860014 0.4036799248779985 0.1569550000000035  
0.4302098144859983 0.4417399248780001 0.1569470000000024  
0.9302098144859983 0.4417399248780001 0.1569470000000024  
0.1803718144860014 0.9036799248779985 0.1569550000000035  
0.6803718144860014 0.9036799248779985 0.1569550000000035  
0.4302098144859983 0.9417399248780001 0.1569470000000024  
0.9302098144859983 0.9417399248780001 0.1569470000000024  
0.0705658144860024 0.0838719248779967 0.2018879999999967  
0.5705658144860024 0.0838719248779967 0.2018879999999967  
0.3205848144859971 0.2614889248780017 0.2018989999999974  
0.8205848144859971 0.2614889248780017 0.2018989999999974  
0.0705658144860024 0.5838719248779967 0.2018879999999967  
0.5705658144860024 0.5838719248779967 0.2018879999999967  
0.3205848144859971 0.7614889248780017 0.2018989999999974  
0.8205848144859971 0.7614889248780017 0.2018989999999974  
0.2286048144859976 0.4163089248780025 0.2607700000000008  
0.7286048144859976 0.4163089248780025 0.2607700000000008  
0.9786338144860025 0.4290029248779987 0.2607700000000008  
0.4786338144860025 0.4290029248779987 0.2607700000000008

0.2286048144859976 0.9163089248780025 0.2607700000000008  
0.7286048144859976 0.9163089248780025 0.2607700000000008  
0.9786338144860025 0.9290029248779987 0.2607700000000008  
0.4786338144860025 0.9290029248779987 0.2607700000000008  
0.2285998144860031 0.1663739248780018 0.2627069999999989  
0.7285998144860031 0.1663739248780018 0.2627069999999989  
0.9787218144860006 0.1789779248779979 0.2627049999999969  
0.4787218144860006 0.1789779248779979 0.2627049999999969  
0.2285998144860031 0.6663739248780018 0.2627069999999989  
0.7285998144860031 0.6663739248780018 0.2627069999999989  
0.9787218144860006 0.6789779248779979 0.2627049999999969  
0.4787218144860006 0.6789779248779979 0.2627049999999969  
0.0660842646936947 0.8297246538569997 0.3250892086468443  
0.5637203669926321 0.8305322346663624 0.3253130312483745  
0.8158429903456347 0.5153903506976723 0.3255574707461450  
0.3167445095125730 0.5164288297694063 0.3253881268156841  
0.0652154395786926 0.3358946905394784 0.3256469643183703  
0.5632969822542340 0.3358021124644343 0.3257768933600647  
0.8099490634704609 0.0121203853131868 0.3261319510937948  
0.3118929332820624 0.0133860840235613 0.3259502564957252  
0.4344947588156373 0.1817927900240776 0.3728317858304673  
0.9354796038018749 0.1825641015400676 0.3723245832662611  
0.6852085172074057 0.1693518677771071 0.3739361513872039  
0.1855258499547120 0.1688113569726516 0.3743158880790597  
0.6849667774649073 0.6672742900105686 0.3736362226327575  
0.1859918893679739 0.6671003807234265 0.3741874292211901  
0.9364821623010763 0.6802800371910364 0.3749873521566633  
0.4360064761973388 0.6806363746336208 0.3756498014562279  
0.4479955646365934 0.9304057609301069 0.3845015812959772  
0.9492691110804813 0.9297552948293449 0.3836771179388156  
0.6962079762004131 0.4197934286745993 0.3853235156693725  
0.1968517563664776 0.9169215122976785 0.3847116205838018  
0.6959647068277840 0.9164642491606013 0.3845468903144725  
0.1968417755164359 0.4198959953657811 0.3852896879424824  
0.9457234878754894 0.4309831833664206 0.3855241811535163  
0.4452581937362315 0.4312435429493833 0.3855976011955259  
0.8145598767189920 0.0682222738518455 0.4284810104027920  
0.3124550760848939 0.0698390537811961 0.4303830893258364  
0.5567174964155788 0.2717618008495963 0.4292902947704856  
0.0589280979857274 0.2720405483977697 0.4296787203027281  
0.8071368423764205 0.5823083938313994 0.4307718156491260  
0.3088865121035663 0.5798911864126155 0.4315510578971133  
0.0622091869296173 0.7777391942392278 0.4320670666836346  
0.5632848666915720 0.7784707521290107 0.4326702241245427

0.6981343880672212 0.4105513726004313 0.4703933644148001  
0.9492960517364676 0.4415718477369550 0.4708629280489409  
0.1989546452369444 0.4093849692233240 0.4726536981702126  
0.4491110786313932 0.4406856963774172 0.4731031382118728  
0.9528134804991305 0.9406359939736881 0.4750398905937924  
0.7040686621746045 0.9102903963895488 0.4756448854971821  
0.2025901014757105 0.9095412258739675 0.4753755404873981  
0.4531815217229345 0.9408674125182682 0.4759889885669070  
0.1647174024179638 0.1542327755916341 0.4848981352576555  
0.6681254885398347 0.1533502976603999 0.4836255142550950  
0.9130667630894564 0.1999259718542534 0.4849809696863349  
0.4158452283068390 0.1988614416238743 0.4856924662251257  
0.9162409750823473 0.6956925342061898 0.4874513836724821  
0.6651434605761788 0.6509338786025693 0.4884135119595261  
0.4181470172431939 0.6961255217308040 0.4875625306781339  
0.1641053815230298 0.6502676697040900 0.4874639547143549  
0.0484670663321722 0.3420559030898845 0.5292352247839425  
0.8060668953395608 0.4975397670130426 0.5290277433320349  
0.5649450195710071 0.3378149270520343 0.5290635267691828  
0.8152219338052239 0.0255393737423138 0.5323961982413391  
0.3053782228459870 0.5091897705118505 0.5308655532595181  
0.3042562184675691 0.0269841276744644 0.5320455660804481  
0.0649941825294856 0.8350046400543208 0.5330499323755780  
0.5675596534921422 0.8355933916293409 0.5338126941982309  
0.2070339230195108 0.3917925806218626 0.5863152595090045  
0.7290175150391990 0.6579300782885922 0.5862059224909406  
0.4748481767989038 0.9461109671869834 0.5936235903224052  
0.4713308016556116 0.4379767476123981 0.5880272558786594  
0.9636240726479597 0.4341196076390444 0.5906930303546369  
0.7161124519429607 0.4112235794111759 0.5907400066488204  
0.7394410418897166 0.9247270916740793 0.5948328306909165  
0.2345674574154166 0.9040523080180338 0.5935663269958615  
0.9843195949901178 0.9307874554735001 0.5974520541101809  
0.2106208903322241 0.6459368677902450 0.5964672358141976  
0.9482928971275580 0.1890343711099242 0.5952558729733535  
0.6894329488060112 0.1556662900775394 0.6058485652207777  
0.9562462045256397 0.6934898758681335 0.6022805646691154  
0.4516982239249724 0.1921165212697488 0.5930999158999315  
0.1904377440839330 0.1370730433476252 0.6033165152955310  
0.3170655258132114 0.3114736300012664 0.6884543630678205  
0.6311686653181612 0.5319022798765866 0.6864139965711895  
0.3410528144859981 0.0495749248780015 0.1009499999999974  
0.8410528144859981 0.0495749248780015 0.1009499999999974  
0.0910498144859986 0.2957249248780016 0.1009409999999988



0.5910498144859986 0.2957249248780016 0.1009409999999988  
0.3410528144859981 0.5495749248780015 0.1009499999999974  
0.8410528144859981 0.5495749248780015 0.1009499999999974  
0.0910498144859986 0.7957249248780016 0.1009409999999988  
0.5910498144859986 0.7957249248780016 0.1009409999999988  
0.8259103936242845 0.2948895811409690 0.4268716283622240  
0.0772209701837991 0.5530780844022405 0.4269664912394738  
0.5752619447242618 0.5531566045862961 0.4273152827644012  
0.3255254266817242 0.2964710792481370 0.4273729820336551  
0.0778818447499549 0.0443687905642167 0.4281840738505190  
0.8291065959873291 0.8075848512579803 0.4282762319588589  
0.5786986637921767 0.0440613483827828 0.4282156850272276  
0.3293853492431446 0.8063379535018066 0.4284925338120664  
0.0861768144860022 0.0466919248779973 0.0467230000000001  
0.5861768144860022 0.0466919248779973 0.0467230000000001  
0.3362088144859996 0.2985189248780031 0.0467140000000015  
0.8362088144859996 0.2985189248780031 0.0467140000000015  
0.0861768144860022 0.5466919248779973 0.0467230000000001  
0.5861768144860022 0.5466919248779973 0.0467230000000001  
0.3362088144859996 0.7985189248780031 0.0467140000000015  
0.8362088144859996 0.7985189248780031 0.0467140000000015  
0.0862538144859997 0.0468269248779976 0.1551869999999980  
0.5862538144859997 0.0468269248779976 0.1551869999999980  
0.3361908144860024 0.2986299248780000 0.1551660000000012  
0.8361908144860024 0.2986299248780000 0.1551660000000012  
0.0862538144859997 0.5468269248779976 0.1551869999999980  
0.5862538144859997 0.5468269248779976 0.1551869999999980  
0.3361908144860024 0.7986299248780000 0.1551660000000012  
0.8361908144860024 0.7986299248780000 0.1551660000000012  
0.5705624124493112 0.8016012262461856 0.3720722163938352  
0.0707647298980757 0.8012562870418147 0.3719144978823252  
0.3202056053211949 0.5476149453556227 0.3719887056535042  
0.8195817128224709 0.5476644420345748 0.3721600540831181  
0.0697434295733258 0.3017927333226272 0.3723407769972233  
0.5694883029253741 0.3013018749080610 0.3725558941758793  
0.8206773363746032 0.0483047397835098 0.3732675061150105  
0.3200633035728541 0.0478188752630115 0.3728045501940309  
0.0743590796146336 0.2971272412478442 0.4802977085988603  
0.8258056018079550 0.5532895253469587 0.4802369527615818  
0.5764880123751593 0.2964229326616328 0.4801457902631068  
0.3258625180590803 0.5549269410905373 0.4812276907911411  
0.8267000817769786 0.0504153340884700 0.4851986678016856  
0.5774494077969120 0.7994560563461011 0.4848357920835540  
0.0766820949424864 0.7978789770047501 0.4840945266619724

0.3264373518264708 0.0512923638177816 0.4844133265518107  
0.1176448144859989 0.2829699248780031 0.2292950000000005  
0.6176448144859989 0.2829699248780031 0.2292950000000005  
0.1176448144859989 0.7829699248780031 0.2292950000000005  
0.6176448144859989 0.7829699248780031 0.2292950000000005  
0.3674658144860032 0.0627699248779976 0.2293179999999992  
0.8674658144860032 0.0627699248779976 0.2293179999999992  
0.3674658144860032 0.5627699248779976 0.2293179999999992  
0.8674658144860032 0.5627699248779976 0.2293179999999992  
0.1173948144859978 0.0328739248779968 0.2941629999999975  
0.6173948144859978 0.0328739248779968 0.2941629999999975  
0.3676208144860027 0.3126789248780000 0.2941769999999977  
0.8676208144860027 0.3126789248780000 0.2941769999999977  
0.1173948144859978 0.5328739248779968 0.2941629999999975  
0.6173948144859978 0.5328739248779968 0.2941629999999975  
0.3676208144860027 0.8126789248780000 0.2941769999999977  
0.8676208144860027 0.8126789248780000 0.2941769999999977  
0.6215016897627537 0.5317287157686712 0.5520083968195505  
0.1197627575066178 0.5283761077683508 0.5542521240741523  
0.8654904530575219 0.3149292078552082 0.5530475233056448  
0.6152788439541436 0.0369391730792491 0.5629268741151802  
0.3716082077293403 0.3222974609277244 0.5523759189341434  
0.1192013519598373 0.0176068627262668 0.5575433000345880  
0.8591356171697099 0.8073802702174082 0.5633291002571944  
0.3912884374220748 0.7924066984226653 0.5664780391406063  
0.8281933890783444 0.5485836278139004 0.6207945357266094  
0.8449060092379539 0.0541275665359555 0.6237288745096806  
0.0920872958818405 0.2961681293096501 0.6210257614222431  
0.5689930730396406 0.3213639320168969 0.6230730738775734  
0.3534531857188764 0.0601257843942685 0.6238243467114483  
0.1104747651127273 0.7856636181105462 0.6243710430073298  
0.4796286718594618 0.7109428271908269 0.6395528133768755  
0.2739761291534354 0.5376639794717928 0.6435271282771539
